1 **An Examination of an Enhanced Remote Sensing Method for Agent Attribution of**  
2 **Forest Disturbance**

3

4 [bioRxiv]

5

6 Hugh Marshall Worsham<sup>1</sup>

7 <sup>1</sup>*Energy and Resources Group, University of California, Berkeley*

8

9 Corresponding:

10 Hugh Marshall Worsham

11 310 Barrows Hall

12 University of California, Berkeley

13 Berkeley, CA 94720

14 United States

15 [worsham@berkeley.edu](mailto:worsham@berkeley.edu)

16 <https://orcid.org/0000-0001-7924-040X>

17 **Abstract**

18 Patterns of disturbance in Sierra Nevada forests are shifting as a result of changing climate  
19 and land uses. These changes have underscored the need for a monitoring system that both  
20 detects disturbances and attributes them to different agents. Addressing this need will aid  
21 forest management and conservation decision-making, potentially enhancing forests'  
22 resilience to changing climatic conditions. In addition, it will advance understanding of the  
23 patterns, drivers, and consequences of forest disturbance in space and time. This study  
24 proposed and evaluated an enhanced method for disturbance agent attribution. Specifically,  
25 it tested the extent to which textural information could improve the performance of an  
26 ensemble learning method in predicting the agents of disturbance from remote sensing  
27 observations. Random Forest (RF) models were developed to attribute disturbance to three  
28 primary agents (fire, harvest, and drought) in Stanislaus National Forest, California,  
29 U.S.A., between 1999 and 2015. To account for spectral behavior and topographical  
30 characteristics that regulate vegetation and disturbance dynamics, the models were trained  
31 on predictors derived from both the Landsat record and from a digital elevation model. The  
32 predictors included measurements of spectral change acquired through temporal  
33 segmentation of Landsat data; measurements of patch geometry; and a series of landscape  
34 texture metrics. The texture metrics were generated using the Grey-Level Co-Occurrence  
35 Matrix (GLCM). Two models were produced: one with GLCM texture metrics and one  
36 without. The per-class and overall accuracies of each model were evaluated with out-of-bag  
37 (OOB) observations and compared statistically to quantify the contribution of texture  
38 metrics to classification skill. Overall OOB accuracy was 72.0% for the texture-free model  
39 and 72.2% for the texture-dependent model, with no significant accuracy difference between  
40 them. Spatial patterns in prediction maps cohered with expectations, with most harvest  
41 concentrated in mid-elevation forests and fire and stress co-occurring at lower elevations.

42 Altogether, the method yielded adequate identification of disturbance and moderate  
43 attribution accuracy for multiple disturbance agents. While textures did not contribute  
44 meaningfully to model skill, the study offers a strong foundation for future development,  
45 which should focus on improving the efficacy of the model and generalizing it for systems  
46 beyond the Central Sierra Nevada.

## 47 1. Introduction

48 Disturbance regulates the composition and structure of temperate forests by altering  
49 processes of vegetation growth, death, decomposition, and regeneration (Turner 2010).

50 Disturbance agents interact with pre-disturbance conditions to produce variable effects  
51 with profound consequences for post-disturbance regeneration (Collins and Roller 2013,  
52 Coop et al. 2016, Shive et al. 2018), as well as for carbon storage, water cycling, timber  
53 productivity, wildlife habitat, and other ecological goods and services that forests provide.

54 Consider three examples. In the highest-intensity regions of a wildfire, living trees  
55 of all age classes may be carbonized or left as standing or downed deadwood, while organic  
56 material is consumed from the surface through much of the root zone (Cochrane and Ryan  
57 2009, Perry et al. 2011). On the lower-intensity margins, fire may thin the understory or  
58 selectively kill weakened individuals and more vulnerable species, freeing resources that  
59 enable mid- to late-seral species to release (Braziunas et al. 2018). A clear-cut harvest, in  
60 turn, abruptly removes most or all tree cover, leaving few or no standing stems (Franklin et  
61 al. 2002, Tappeiner et al. 2015). Post-harvest regeneration must begin from “the ground  
62 up,” via an existing seedbank or artificial seeding or planting. On the other hand, some  
63 forest disturbances are less abrupt. Mortality due to desiccation stress or beetle infestation  
64 typically unfolds over months or years, often with species or age-class selectivity.

65 Infestations yield relatively slow declines in chlorophyll canopy content, frequently yielding  
66 distinctive “red” and “gray” phases of decline, and standing dead stems may remain on site  
67 for many years (Ciesla 2000). When salvage logging is not applied, much of the nutrient  
68 stock may also be retained on site, as dead stems fall and decompose, but the site may face  
69 an increased wildfire risk (Tappeiner et al. 2015, Larvie et al. 2018).

70 From a theoretical perspective, what constitutes a disturbance, and how  
71 disturbances ought to be differentiated from other kinds or degrees of perturbation that

72 affect biological communities, have proven thorny questions to answer (Sousa 1984).  
73 Disturbances are often labeled “natural” (e.g., fire, windthrow, flood, pest infestation,  
74 drought) or “anthropogenic” (e.g., biological invasion, forest management treatment,  
75 fragmentation, roadcut, plantation-conversion) (Dale et al. 2001, Turner and Gardner  
76 2015). However, insisting on a sharp line between these categories is unrealistic. In the  
77 western United States, as in other parts of the world, the legacies of indigenous landscape  
78 management practices likely cannot be disentangled from the region’s “natural” fire regime  
79 (Conedera et al. 2009, Trauernicht et al. 2015). Equally, anthropogenic climate change  
80 appears to be influencing “natural” disturbance processes such as desiccation stress and  
81 dieback in western U.S. forests (Clark et al. 2016).

82         Two further problems beset theoretical characterizations of disturbance. First,  
83 without some qualification, the concept implies a possibility of stasis that rarely occurs in  
84 natural systems (Connell and Sousa 1983, Sousa 1984). Many biological communities  
85 readily shift among a set of alternative stable states (Beisner et al. 2003), or even  
86 alternative transient states (Fukami and Nakajima 2011). In the absence of an objective  
87 way to identify where a system lies within its alternative-state frontier at any moment, it is  
88 hard to say when a perturbation is disruptive enough to qualify as a disturbance. Second,  
89 disturbance agents often interact: to cite one example, drought stress can inhibit trees’  
90 defenses against infections and parasites, in addition to rendering them more vulnerable to  
91 fire. (Anderegg et al. 2015, Johnstone et al. 2016, Seidl and Rammer 2017, Simler et al.  
92 2018). To attempt to differentiate particular agents as proximate or ultimate causes of  
93 disturbance often seems more a hermeneutic exercise than an empirical one.

94         Considering these difficulties, while acknowledging that disturbance is nevertheless  
95 a useful way to describe a class of environmental phenomenon, this paper holds with the  
96 idea that disturbance “lies near one extreme of the continuum of perturbations that affect

97 organisms” (Sousa 1984). It also assumes, *sec.* Peters et al. (2011), that an adequate  
98 description of a given disturbance needs to account for at least: (1) the environmental  
99 agent(s) of disturbance (“drivers”), (2) structural and functional characteristics of the  
100 system prior to the disturbance (“initial system properties”), and (3) interactions between  
101 the first two components that give rise to physical, chemical, and biological mechanisms of  
102 change (“mechanisms”). An adequate description of disturbance should also consider the  
103 consequences explicitly. The outcomes of forest disturbance can include vegetation  
104 morbidity and mortality in the short-term and changes in age class, species composition  
105 and dominance, hydrologic function, or ecosystem state (among others) in the long-term.  
106 For this paper’s purposes, I take forest disturbance to mean a discrete application of energy  
107 to, or expenditure of energy within, a forested landscape that results in mortality,  
108 morbidity, or displacement of vegetation and that opens opportunities for the establishment  
109 of new individuals. I am primarily concerned with disturbances observable at the hectare  
110 scale (10,000 m<sup>2</sup>) and larger, because of size of the area of study (~3600 km<sup>2</sup>) and the spatial  
111 resolution of the observations used (~900 m<sup>2</sup>).

112

### 113 *1.1. Forest disturbance and climate change*

114 A growing body of evidence suggests that patterns of disturbance in the forests of  
115 the Sierra Nevada of California are shifting (Breshears et al. 2005, Millar et al. 2007,  
116 Adams et al. 2010, Allen et al. 2010, Cohen et al. 2016). For instance, timber harvesting in  
117 national forests has decreased since the 1970s, while the incidence of wildfire and pest  
118 infestation has increased (Oswalt et al. 2019). In the Sierra Nevada, desiccation stress was  
119 widespread during the 2012–2015 drought, but it was also attended in some areas, such as  
120 Sequoia & Kings Canyon National Parks, by severe outbreaks of western and mountain  
121 pine beetles (Larvie et al. 2018).

122           So far, one consistent net effect of these shifts is high tree mortality (Potter 2017,  
123   Crockett and Westerling 2018, Fettig et al. 2019). The new dynamics may also be inducing  
124   species shifts and biodiversity losses (Paz-Kagan et al. 2017), and they could drive the  
125   replacement of forests by non-forest land cover types, such as shrubland or meadow  
126   (Thorne et al. 2017, 2018). Some have projected that these trends will continue as a result  
127   of climate change and anthropogenic activity, with consequent impacts on the services that  
128   currently forested landscapes provide.

129           Given these trends, advancing understanding of the patterns, drivers, and  
130   consequences of forest disturbance in space and time is a research priority (Trumbore et al.  
131   2015, Johnstone et al. 2016). McDowell et al. (2015) note a “lack of a comprehensive  
132   monitoring system” that can both identify terrestrial disturbances and attribute them to  
133   specific agents. Filling this gap would help forest resource managers understand how  
134   forests respond to changing climatic conditions. In addition, reliable quantification of  
135   historical and emerging disturbances will help to improve the skill of empirical models of  
136   spatial pattern, population dynamics, forest regeneration, carbon storage, and water  
137   cycling. In the long run, this effort could also improve the prospects for quantitative  
138   description of ecological disturbance in the context of alternative stable (or transient) states  
139   by improving the resolution of pre- and post-disturbance baselines. Finally, it will support  
140   strategies for conserving, restoring, or adaptively transitioning forests in areas facing  
141   increasing vulnerabilities to various agents of disturbance (Millar et al. 2007, Hansen and  
142   Turner 2019).

143

#### 144   *1.2. Review of remote sensing methods for forest disturbance detection and attribution*

145           Over the past decade, efforts to detect and attribute forest change have proliferated.  
146   However, the field has yet to settle on a set of approaches that produce reliable estimates

147 that can be compared across disturbance regimes or regions. The field currently comprises a  
148 somewhat incongruent set of algorithms, satellite and aerial monitoring platforms, and  
149 field assessment protocols. The USDA Forest Service's Forest Inventory and Analysis (FIA)  
150 program provides data on most classes of forest-disturbance agent, but only across a  
151 network of sampling plots (Schroeder et al. 2014). In California, the dataset extends back to  
152 2001, with repeat surveys conducted on each plot approximately once a decade (Christensen  
153 et al. 2016). This relative infrequency, along with the FIA's policy of obscuring the precise  
154 locations of most sample plots, substantially limits the data's suitability for quantifying  
155 spatially continuous change. Aerial insect and disease detection surveys are similarly  
156 discontinuous and coarsely resolved in space and time. In response to these limitations,  
157 researchers and managers have increasingly turned to satellite remote sensing methods for  
158 their ability to capture a wide range of spatial and temporal variability across large regions.

159         The history of remote sensing methods for forest change detection extends at least  
160 as far as the 1920s, when an entomology study analyzed oblique aerial photography to  
161 identify spruce budworm mortality in Canadian spruce forests (Ciesla 2000). This process  
162 was improved substantially by a double-sampling approach developed in the 1950s and  
163 1960s, in which tree mortality estimates were made through stereoscopic interpretation of a  
164 large sample of photographs and scaled up through statistical comparison with a smaller  
165 sample of ground plots (Heller et al. 1959, Wear et al. 1966). Double sampling allowed for  
166 statistically valid estimations of canopy loss across wide geographic areas (Lund 1997).  
167 With the increasing availability of color and infrared film, researchers and forest managers  
168 also began to exploit spectral information to identify crown fade and red and grey phases of  
169 beetle infestations (Hadfield 1968, Hanson and Lautz 1971). With the launch of the first  
170 civilian Earth-observing satellites, Landsat I in 1972, Geostationary Operational



171 Environmental Satellite (GOES-1) in 1975, and the Advanced Very High Resolution  
172 Radiometer (AVHRR) in 1978, remote sensing methods for forest change detection boomed.  
173       Methods developed early on—and still in widespread use today—derive information  
174 by comparing two or more images made at separate points in time over the same  
175 geographic area. In pre-classification change detection methods, analysts compare the  
176 images' raw spectral data. In post-classification techniques, each pixel in an image is  
177 assigned to a defined land-cover type, and intertemporal differences are evaluated as  
178 changes in class (Iverson et al. 1989). While post-classification approaches allow for the  
179 integration of multiple data types and can minimize the effects of exogenous atmospheric or  
180 radiometric distortions, they can carry an additional error burden due to information loss in  
181 the classification procedure (Coops et al. 2007). More complex approaches in this category  
182 involve principal component analysis, in which correlated spectral returns are compressed  
183 so that change detection is performed on independent linear transformations of the original  
184 data, and change vector analysis, which decomposes spectral responses into magnitude and  
185 directional components (Fung and Ledrew 1987, Lu et al. 2004, Khorram et al. 2016). In  
186 addition to uncovering dramatic vegetation changes around the world, these two-date  
187 change-detection approaches identified two important requirements for any attempt at  
188 forest change detection. First, special care must be taken to align the images geometrically  
189 and radiometrically as nearly as possible to avoid false-negative change detection as a  
190 result of registration inconsistencies. Second, it is imperative to account for seasonal  
191 change, either through multi-band analysis, index computation, or seasonal compositing of  
192 multiple images, as phenological change can easily be confused with stress-related change,  
193 particularly in visible wavelengths (Khorram et al. 2016).

194       Because vegetation disturbance is a dynamic process operating on multiple  
195 timescales, two-date comparison methods carry obvious limitations. In the mid-2000s, a

196 suite of algorithms was developed to address this gap; these operate on the unique time  
197 signatures that different directions and magnitudes of vegetation change leave behind  
198 (García-Haro et al. 2001, Potter et al. 2007, Goodwin et al. 2008, Vogelmann et al. 2009,  
199 2012). Such approaches are able to detect either abrupt changes (anomalies) or longer-  
200 duration changes (trends) with suitable accuracy for monitoring and management. The  
201 most sophisticated of these is the Vegetation Change Tracker (VCT) (Huang et al. 2010).  
202 This method characterizes the temporal profile of each pixel in a time series stack and  
203 classifies the pixels into one of several types (persistent forest, persistent non-forest,  
204 disturbed forest, or regenerating forest), based on comparisons of absolute change in the  
205 series with predetermined thresholds. Although these improve on two-date methods, as  
206 Kennedy et al. (2010) point out, anomaly-targeted algorithms tend to exclude long-term  
207 trend changes as noise, while trend-targeted algorithms do the same for abrupt anomalies.

208         Since 2010, a new generation of algorithms has emerged to disentangle remotely  
209 sensed time series data to capture both abrupt disturbance events and longer-phase trend  
210 change. These temporal segmentation algorithms are summarized in Table 1.

211         Although the methods differ somewhat in their implementation, in general they  
212 apply a statistical model, such as linear segmentation, Fourier curve fitting, or quadratic  
213 smoothing, to a time-series stack of remotely sensed data in order to derive information  
214 about each pixel's spectral trajectory over time. The output is usually an array that  
215 includes a per-pixel estimate of the location, timing, duration, and in some cases,  
216 magnitude of spectral change. Based on these outputs, an analyst can inquire about  
217 patterns of behavior among pixels or among aggregates formed based on the adjacency or  
218 similarity of pixels in one or more dimensions.

219         In the U.S., researchers and managers have deployed both two-date image  
220 differencing and the more complex algorithmic approaches in several prominent

221 disturbance monitoring programs. Monitoring Trends in Burn Severity (MTBS) uses a two-  
222 date procedure on Normalized Burn Ratio (NBR) values from Landsat images to map the  
223 severity of large fires (Eidenshink et al. 2007). The ForWarn system uses Normalized  
224 Difference Vegetation Index (NDVI) anomaly calculated on MODIS data to model  
225 disturbances in near-real-time. However, its coarse spatial resolution (minimum 250 m)  
226 makes it insensitive to finer-scale disturbances, including most management treatments on  
227 public forested lands in the western U.S. (Hargrove et al. 2009). The LANDFIRE  
228 disturbance database resolves 12 disturbance agent classes and dozens of sub-classes at 30-  
229 m spatial resolution (Rollins 2009, Vogelmann et al. 2011). The program draws on multiple  
230 algorithmic, remote sensing, and *in situ* data sources, including MTBS and VCT, but its  
231 evidently incomplete record dates back only to 1999. The North American Forest Dynamics  
232 program has leveraged the VCT algorithm to build a wall-to-wall map of U.S. forest  
233 disturbance across the entire Landsat record at 30-m scale (Goward et al. 2016).

234         The efforts above have advanced *detection* of forest disturbance; methods for *agent*  
235 *attribution*, on the other hand, remain embryonic. The most reliable approaches require  
236 extensive technician analysis of multiple datastreams, including *in situ* observations,  
237 management treatment records, and aerial- and satellite-platform sensing (e.g., Schmidt  
238 2014, Cohen et al. 2016). The process is time-intensive and beset with error when multiple  
239 forest types are under investigation, when multiple disturbance agents are active, and  
240 when a site experiences more than one disturbance in the same period of analysis.

241 Automating this process through empirical modeling may help to reduce time and resource  
242 requirements, in addition to improving accuracy of retrospective analyses and enhancing  
243 the relevance of near-real-time disturbance detection and monitoring.

244         To date, a limited number of efforts at further automating agent attribution have  
245 been published. The methods in this paper are heavily indebted to these projects. Neigh et

246 al. (2014) used multiple indices derived from AVHRR and Landsat products in a decision-  
247 tree classification to map insect kill and harvest in northern forests of Wisconsin and  
248 Minnesota. They achieved per-class accuracy of 65–70% and overall accuracy of 72%.  
249 However, the same method applied to forests in the Pacific Northwest yielded inferior  
250 results, indicating a need for further refinement before generalizing across forest types.  
251 Kennedy et al. (2015) combined LandTrendr temporal segmentation of the 1984–2014  
252 Landsat stack with a Random Forest classification approach (Breiman 2001) to map  
253 multiple agent classes in the Pacific Northwest. Oeser and colleagues (2017) applied a  
254 similar approach in Central European temperate forests, applying BFAST temporal  
255 segmentation to identify abrupt forest loss and passing the resulting spatio-temporal  
256 information into a Random Forest classification. They identified harvest, windthrow,  
257 cleared windthrow, and bark beetles to 76–86% accuracy. Schroeder et al. (2017) classified  
258 fire, harvest, conversion, wind, and drought stress with a Random Forest model trained on  
259 VCT and ancillary geophysical variables. Their approach yielded high accuracy (69–86%)  
260 across ten Landsat scenes made over various ecoregions of the United States. Interestingly,  
261 accuracy was higher when information about the timing (year) of disturbance was excluded  
262 from the model. Shimizu et al. (2017) also used Random Forest to classify patches of  
263 contemporaneously disturbed pixels to discriminate anthropogenic forest changes, such as  
264 logging, plantation conversion, and urbanization in Myanmar. Finally, Shimizu et al. (2019)  
265 evaluated the relative effectiveness of several different approaches to disturbance-agent  
266 classification in a South Asian tropical forest: threshold-based detection using one spectral  
267 index, machine-learning methods trained on temporally segmented vegetation index values,  
268 and one machine-learning method trained directly on the Landsat time series without prior  
269 temporal segmentation. They found that direct prediction performed better than  
270 approaches that included temporal segmentation, with considerable savings in complexity

271 and computational expenditure, but it remains to be seen whether this approach works as  
272 well as two-stage methods in other forest types.

273       Clearly, there is enthusiasm for solving the agent-attribution problem, and the early  
274 work suggests that remotely sensed information shows promise for resolving different types  
275 of forest disturbance into distinct classes. But much remains to be done to achieve a  
276 generalizable method. Some key areas for development include:

- 277       (1) identifying the most effective combination of spectral bands and indices for  
278       accurate modeling across landscape types;
- 279       (2) determining whether a two-stage method (temporal segmentation plus  
280       classification) or a one-stage method (direct classification without temporal  
281       segmentation) consistently yields higher accuracy;
- 282       (3) making use of new spectral measurements of solar-induced chlorophyll  
283       fluorescence (SIF), such as the NASA Orbiting Carbon Observatories' (OCO-2  
284       and OCO-3) SIF products and the Near-Infrared Reflectance of Vegetation  
285       (NIR<sub>v</sub>) index; and
- 286       (4) assessing whether textural information derived from Landsat scenes can improve  
287       classification results.

288 Here, I address the last two of these prompts by making novel use of NIR<sub>v</sub> and by testing  
289 the contribution of textural information to agent-attribution accuracy.

290

### 291 1.3. *NIR<sub>v</sub>*

292       This study marks the first use of NIR<sub>v</sub> in a change-detection procedure. NIR<sub>v</sub>  
293 directly measures the fraction of near-infrared reflectance attributable to chlorophyll,  
294 yielding accurate estimates of photosynthesis rate and gross primary production (GPP)  
295 (Badgley et al. 2017, 2019, Wu et al. 2020). NIR<sub>v</sub> tends to be more sensitive to decreases in

296 photosynthetic capacity than other vegetation indices, which offers reason to think that a  
297 model trained on NIRv may improve detection of sublethal phases of stress-related  
298 disturbances (e.g., drought, beetle infestation).

299

#### 300 1.4. *Texture*

301 On texture, as this paper's introduction describes, different agents and intensities of  
302 disturbance leave different structural legacies on forested landscapes. Vegetation structure,  
303 in turn, has been shown to resolve well in textural patterns derived from optical remote  
304 sensing measurements (Wood et al. 2012, Lam et al. 2013). At the most basic level, *texture*  
305 describes certain spatial properties of a surface—in ordinary experience, these include  
306 properties such as smoothness, coarseness, or sharpness. Quantifying texture for analytic  
307 purposes is a matter of measuring and expressing differences between high and low points  
308 on a surface ( $z$  differences in Cartesian space), and how near or far those points are from  
309 one another ( $x$ - $y$  differences). Smoother surfaces tend to have smaller  $x$ - $y$ - $z$  differences,  
310 while rougher surfaces tend to have larger differences. Smoothness and coarseness are only  
311 two of many relevant textural properties that can be measured statistically from images of  
312 a surface. One widely deployed set of metrics is that derived from the Gray Level Co-  
313 occurrence Matrix (GLCM) (Haralick et al. 1973). The GLCM procedure tabulates the  
314 frequency of co-occurrence of pixel brightness values in adjacent pixels using a set of  
315 moving-window comparisons. These frequencies are then used to compute a set of 14+  
316 distinct measurements of texture.

317 At the pixel level, GLCM metrics describe second-order statistical properties. First-  
318 order information, such as the spectral reflectance intercepted by a sensor and recorded as  
319 pixel values, generally measures physical behavior (reflectance of electromagnetic energy)  
320 or chemical activity (photosynthesis) or a statistically verifiable proxy for the same. GLCM,

321 on the other hand, quantifies relationships between *pairs* of pixels (Hall-Beyer 2017). First-  
322 and second-order metrics tend to be statistically independent of each other and so can  
323 contribute complementary information to landscape analyses. GLCM textures have long  
324 been applied in combination with other variables to improve accuracy of land-use and land-  
325 cover classification (Coburn and Roberts 2004). The applicability of GLCM metrics for forest  
326 structure analysis has been demonstrated using both high-resolution (IKONOS) and  
327 moderate-resolution (SPOT, Sentinel-1, ASTER, Landsat) data, though it likely has much  
328 lower utility in land cover applications at spatial resolutions lower than ~50 m per pixel  
329 (Marceau et al. 1990, Ozdemir et al. 2012, Wood et al. 2012).

330       Textural metrics have the potential to improve disturbance agent attribution  
331 because of the relationships between agent and stand structure on the ground, and between  
332 stand structure and texture in images. These relationships may be especially important in  
333 the Central Sierra Nevada forests evaluated in this study because of the agents that are  
334 most prevalent in the region: fire, drought, insects, and harvest. These tend to leave  
335 visually distinctive and analytically differentiable patterns on the landscape (Fig. 1) and  
336 may contribute decision-enhancing information to an agent-attribution modeling procedure.

337

### 338 1.5. *Motivation*

339       California's Central Sierra Nevada offers valuable opportunities to study forest  
340 disturbance and its drivers using the emerging remote sensing methods described above.  
341 Observed climatic changes, including warmer winter and spring temperatures,  
342 precipitation shifts from snow to rain, lower peak snowpack depth, and early spring  
343 drydown, have been documented across the region (Vicuna and Dracup 2007). These shifts  
344 are connected to a multitude of forest changes. For example, whitebark pine (*Pinus*  
345 *albicaulis* Engelm.) and ponderosa pine (*Pinus ponderosa*) have experienced widespread

346 mortality due to mountain pine beetle, western pine beetle, and desiccation stress (Millar et  
347 al. 2012, Birdsey et al. 2019). The region has also faced compositional shifts and increases  
348 in stem density in mid-elevation coniferous stands, as well as canyon oak regeneration in  
349 stands previously occupied by conifers (Dolanc et al. 2013, 2014).

350 The site selected for study, Stanislaus National Forest, is an archetype of these  
351 trends. Fire, harvest, thinning, drought, and insect stress have been extensive and well  
352 distributed across elevational gradients over the past three decades. The prevalence of  
353 disturbance makes it a prime site for an attempt at complex disturbance agent attribution.  
354 Indeed, the Forest has been a subject of at least two prior disturbance-detection studies  
355 using LandTrendr and VCT, respectively (Schmidt 2014, Birdsey et al. 2019). Both relied on  
356 manual interpretation of multiple data sources for agent attribution. Schroeder et al.'s  
357 (2017) semi-automated approach using VCT and Random Forest classification included one  
358 Landsat tile that partially overlapped the Forest. Their results showed agent classification  
359 agreement above 90 percent for the Sierra Nevada site, indicating strong potential for this  
360 approach in the region.

361 The overarching aim of this project was to test whether a Random Forest ensemble  
362 learning method for classifying forest disturbance agents at the 30-m Landsat pixel scale  
363 can be improved by incorporating textural information.

364

#### 365 1.6. *Research questions*

- 366 1. To what extent does the inclusion of textural information improve attribution of the  
367 agents of disturbance in Stanislaus National Forest?  
368
- 369 2. What are the relative contributions of three independent textural metrics to  
370 classification accuracy?



371

372 *1.7. Study objectives*

- 373 1. Agent-attribution model: Evaluate the capacity of an ensemble learning method  
374 to classify Landsat-derived pixel data according to three agent-based forest  
375 disturbance classes (fire, harvest, stress) and stable forest/non-forest.
- 376 2. Texture contribution to accuracy: Assess the per-class and overall accuracy of  
377 texture-free and texture-dependent agent models to evaluate whether a model  
378 with textural metrics is more effective at identifying agents of disturbance than  
379 one without.
- 380 3. Variable importance: Determine which predictor variables are most useful for  
381 attributing forest disturbance agents in a Sierra Nevada forest.

382

383 **2. Methods**

384

385 *2.1. Study site*

386 Stanislaus National Forest is a 3,634-km<sup>2</sup> federal landscape administered by the  
387 USDA Forest Service on the western slope of the Sierra Nevada in California (Fig. 2). The  
388 forest abuts the northern border of Yosemite National Park and contains three federal  
389 Wilderness areas (Mokelumne, Carson-Iceberg, and Emigrant) to the north and east. The  
390 region's climate is Mediterranean, with average precipitation around 125 cm (990 cm  
391 equivalent snowfall.) The jurisdiction spans a broad elevational gradient, from 450 m in the  
392 western foothills to over 3350 m near the Sierra crest. The Forest contains more than 1200  
393 km of rivers and streams. Vegetative communities include oak woodlands at lower  
394 elevations, mixed conifer forests at middle elevations, and subalpine vegetative  
395 communities at the highest elevations.

396           Since 2000, the Forest has experienced two major wildfires: the 2013–2014 Rim Fire,  
397 which burned 257,314 acres and the 2018 Donnell Fire, which burned 36,450 acres. Forest  
398 ecosystems in the domain are subject to other natural disturbance regimes, such as conifer  
399 beetle eruptions, severe winter wind events, and avalanches. They are also harvested for  
400 merchantable timber and thinned for fire resistance, pest management, species selection,  
401 and site productivity; these operations often register as vegetation loss in change-detection  
402 analyses, but because of forest management practice guidelines, are typically constrained to  
403 clearly delineated areas less than 16 hectares (0.16 km<sup>2</sup>).

404

## 405   2.2.   *Data preparation*

### 406   2.2.1. *Reference data*

407           Ideally, reference data for model training and accuracy assessment would come from  
408 data acquired in the field. However, a consistent, spatially explicit longitudinal record of *in*  
409 *situ* disturbance observations does not exist for California, and due to time and cost  
410 constraints I was unable to assemble such a record myself. Instead, I used the Landscape  
411 Fire and Resource Management Planning Tools (LANDFIRE) Disturbance Public Model-  
412 Ready Events Geodatabase. In its original form, this dataset comprises a set of polygon  
413 shapefiles demarking the locations, extents, types, and timing of disturbances and  
414 management treatments. The polygons are submitted annually to LANDFIRE, a joint  
415 program of the USDA Forest Service and U.S. Department of the Interior, by contributors  
416 from federal and state resource management agencies, private organizations, and  
417 national/regional fire mapping programs, such as MTBS and CalFire’s Fire and Resource  
418 Assessment Program (FRAP). Data submissions must meet minimum standards for  
419 inclusion, and they are subsequently analyzed for positional accuracy and quality and then  
420 corrected for topological inconsistencies. In the Model Ready Events dataset, the set of

421 polygons is reduced to portray one unique event per location per year between 1999 and  
422 2014, using a hierarchical decision procedure. The polygons that comprise the final dataset  
423 are those with the greatest-magnitude impact on vegetation.

424       Because these data were used for training as well as validation, the model inherits  
425 error from the reference set. However, LANDFIRE currently offers the most extensive and  
426 longest record of disturbances and treatments available for the study area. (The dataset  
427 also offers nearly full coverage of the continental United States, which would aid testing of  
428 the generalizability of the methods in this study in the future). Moreover, with the  
429 exception of data generated by MTBS, the records are created without reliance on Landsat  
430 observations. In the study area, because of the extensive records maintained by CalFire  
431 FRAP, none of the fire event polygons were derived from MTBS. It stands to reason that  
432 the reference set is as independent of the predictor data as is feasible. I considered the  
433 reference set sufficient in light of the fact that this is foremost a proof-of-concept study but  
434 acknowledge that more reliable training and reference data would improve the reliability of  
435 the model.

436       I converted the polygons to Geotiff raster format and randomly selected 200 sample  
437 points from each of five strata: fire, harvest/treatment, stress, stable forest, and stable non-  
438 forest. For each of the disturbed points, I preserved the year reported and the assigned  
439 disturbance agent from LANDFIRE. In some cases, the sampling yielded multiple  
440 disturbances per point during the time interval. When this happened, I selected the  
441 highest-severity disturbance in the set to maintain consistency with the procedure in the  
442 temporal-segmentation algorithm described in §2.2.2 below. The 1000 total sample points  
443 represented three classes of disturbance agent (fire, harvest, stress) and two classes of  
444 stability (stable forest, stable non-forest).

445

### 446 2.2.2. Landsat Tier-1 surface reflectance datasets

447 A flowchart of the remaining analytical steps appears in Fig. 3. The next task was to  
448 generate predictor variables for training the classification model. Using the Google Earth  
449 Engine API (Gorelick et al. 2017), I assembled an image collection of Landsat 5 Thematic  
450 Mapper (TM), Landsat 7 Enhanced Thematic Mapper (ETM+) and Landsat 8 Operational  
451 Land Imager (OLI) datasets acquired over the study area, preprocessed to Tier 1 surface  
452 reflectance. ETM+ and OLI data provide moderate-to-high spatial and temporal resolution  
453 (30 meters per pixel for non-thermal bands on a 16-day return interval). They offer  
454 adequate spectral resolution for vegetation change detection.

455 The image collection included all images made during the peak growing season  
456 (June 21 – September 20) in the years between 1999 and 2015, inclusive. Next, to  
457 standardize the ETM+ and OLI data, I applied a slope-intercept harmonization algorithm,  
458 which normalized OLI surface reflectance values to ETM+ values. A detailed discussion of  
459 this procedure is available in Roy et al. (2016). I then applied a masking function to each  
460 image using the pixel-QA band to remove clouds, snow, cloud shadows, and water, in order  
461 to avoid generating outlier band ratio values that could lead to false positive change  
462 detection. The final collection contained 373 images in total, between nine and 31 per year  
463 for an average of 22 images per year.

464 The next step was to build a summary dataset of annual surface reflectance images.  
465 I computed the medoid value per pixel from the annual subsets of masked image  
466 collections. The medoid is a measure of center that minimizes the vector distance to all  
467 other points in the set. In an odd set in one-dimensional number space, this is the median.  
468 In an even set, in which the median would fall in the interval between two values, the  
469 medoid is constrained to one of the values actually present in the dataset. In this case, the

470 medoid computation selected the lower value in the interval. Medoid compositing produced  
471 17 images, one for each year in the study period.

472         The consequence of this compositing was that subsequent analysis evaluated  
473 interannual change, a significant scaling up from the 16-day temporal resolution of the  
474 original Landsat data. There are tradeoffs in any data selection procedure. While some  
475 information is compressed or lost in generating annual medoids, this process reduces the  
476 error in intertemporal comparison resulting from radiometric differences between images  
477 made at different times of day and year. It also helps to moderate phenological variance  
478 and spectral errors thrown by late snowpack or early snowfall. The aim is to produce a  
479 relatively consistent set of images for comparison, while preserving strong signals of  
480 change. Because disturbance legacies usually remain detectable on a forested landscape for  
481 several years after the event (except when salvage harvest is applied), annual compositing  
482 tends to improve the accuracy of disturbance detection on net (Kennedy et al. 2010).

483         Finally, I computed three vegetation indices on the medoid spectral values as inputs  
484 to the temporal segmentation procedure (§2.2.3). Dozens of spectral indices have been  
485 proposed for distinguishing vegetation from other forms of land cover (Khorram et al. 2016).  
486 All require computations, typically on combinations of visible and infrared bands, that  
487 amplify the spectral signal of vegetative cover and diminish the signal of non-vegetative  
488 cover. Several indices have been found especially useful in identifying disturbance (Miller  
489 et al. 2009, Neigh et al. 2014b, Potter 2014, McDowell et al. 2015, Senf et al. 2015, Cohen et  
490 al. 2018). The two most often used are the Normalized Difference Vegetation Index (NDVI)  
491 (Rouse et al. 1974) and Normalized Burn Ratio (NBR) (Keeley 2009). However, recent  
492 studies have concluded that a combination of spectral indices enhances disturbance  
493 detection accuracy, likely because no one index fully captures the spectral behavior of a

494 landscape in flux. Therefore, in keeping with recent trends toward multi-index  
495 classification, I included three indices: NDVI, NBR, and NIR<sub>v</sub> (Table 2).

496 For each index, I scaled the results by 10<sup>3</sup> to allow the temporal segmentation  
497 algorithm to operate on integer values without losing precision and then inverted the  
498 values so that negative index change would correspond with vegetation loss.

499

### 500 *2.2.3. Disturbance detection through temporal segmentation*

501 The final post-processed index images were used to produce a suite of derivative  
502 change variables, which were later applied as predictors in the agent-attribution  
503 classification model.

504 LandTrendr (Kennedy et al. 2010, 2018) is one of several algorithms available for  
505 temporal segmentation of time series data. The core of the algorithm is an attempt to create  
506 fitted models of pixels' spectral behavior. When configured appropriately for the image set,  
507 this process strikes a balance between removing “noisy” interannual variability while  
508 identifying the maximum possible number of significant changes in the pixel's record.  
509 Operating sequentially on each pixel in the stack of annual medoids, the algorithm returns  
510 a series of straight-line segments joined at vertices where the change in spectral value is  
511 significant enough to be considered an inflection point. The algorithm iteratively generates  
512 simpler models and then selects the model that best fits the original data.

513 The Google Earth Engine implementation of the LandTrendr algorithm (Kennedy et  
514 al. 2018) was run over each of the three vegetation index collections. The codebase accepts  
515 several user-defined inputs. I constrained the analysis to starting values of NDVI > 120,  
516 NBR > 170, and NIR<sub>v</sub> > 210. This trimming filtered out values that began below standard  
517 thresholds for vegetation on each index and persisted through the time series as stable non-  
518 forest. I also constrained the analysis to compute a maximum of 12 segments. I considered

519 any change that did not persist for at least one year beyond the initial detection to be  
520 erroneous. (Fast spectral recoveries in forest remote sensing data are more often a result of  
521 radiometric noise or insufficient cloud/shadow masking than of vegetation vigor (Kennedy  
522 et al. 2010)). I therefore removed vertices where an apparent change returned to starting  
523 value within two years. For fitted model selection, I specified two best-fit criteria: the  
524 algorithm must select the model with the most vertices (again, to detect all changes in the  
525 record), but it must have a p-value within 0.75 of the model with the absolute lowest p.

526 Illustrations of the model fitting results appear in Fig. 4, which depicts the spectral  
527 behavior of three randomly selected pixels identified, respectively, as “Disturbed”, “Stable  
528 Forest”, and “Stable Non-Forest” through the temporal segmentation procedure. In this  
529 example, the algorithm simplified the shape of the “Disturbed” pixel’s trajectory from 17  
530 segments in the original NIR<sub>v</sub> returns to 5 in the best-fit model. The fitted model detected  
531 three disturbance events (in 2000, 2001, and 2009), followed by a period of regeneration.  
532 The largest magnitude disturbance occurred between 2000 and 2001 ( $\Delta\text{NIR}_v = 200$ ), with a  
533 duration of one year and a rate of  $200/1 = 200$ . The “Stable Forest” pixel’s trajectory was  
534 reduced to one segment with  $\Delta\text{NIR}_v = 0$ . The “Stable Non-Forest” trajectory was simplified  
535 to two segments. Its absolute NIR<sub>v</sub> values never exceeded the threshold for consideration as  
536 vegetation ( $\text{NIR}_v = 210$ ), so the pixel was considered undisturbed.

537 After finding the best segment fits, several metrics derived from the trajectories  
538 were computed on each pixel, summarized in Table 3. The five-dimensional arrays  
539 containing these values were sliced to include only segments representing negative change  
540 greater than 10 percent, in order to remove periods of stability, periods of vegetation  
541 growth, and low-value outliers. (I make no further inferences about the excluded segments.)  
542 This process operationalized the concept of disturbance as *any negative change in the*  
543 *vegetation index of a pixel greater than 10 percent*. I selected the greatest-magnitude

544 segment for each pixel. Multidimensional analysis would have exceeded the capacity of the  
545 computing resources I have available, and the greatest-magnitude disturbance on a site  
546 typically has the greatest influence on forest structure and regeneration dynamics. Finally,  
547 I cropped the arrays containing these outputs to a multipolygon shapefile delimiting the  
548 boundaries of Stanislaus National Forest (USDA Forest Service 2019).

549

#### 550 *2.2.4. Derived variables*

551 From these outputs, several derivative variables were calculated on each pixel and  
552 on pixel clusters. First, land-cover ternary maps were produced by labeling pixels according  
553 to the three possible trajectory groups identified the temporal segmentation procedure.  
554 Pixels with a detected negative change were labeled “disturbed”; undisturbed pixels with  
555 values persistently above the index vegetation thresholds were labeled “stable forest”; and  
556 undisturbed pixels with values persistently below the index vegetation thresholds as  
557 “stable non-forest.” One ternary map was created for the temporal segmentation results for  
558 each vegetation index, for a total of three maps.

559 Next, texture metrics were computed to quantify the textural characteristics of  
560 different disturbance classes. Using the “glcmTexture” function in Google Earth Engine  
561 (Gorelick et al. 2017), I calculated 14 GLCM metrics on each of the vegetation index images  
562 (3 indices x 17 years x 14 metrics = 294 GLCM metrics). GLCM proceeds by tallying the  
563 frequency of occurrence of pairs of pixel brightness (“grey-level”) values in a user-defined  
564 neighborhood. The frequencies are normalized to the number of observations to produce  
565 probabilities (Hall-Beyer 2017). These probabilities are then applied in a series of  
566 calculations whose results may be roughly categorized as “edge” metrics and “interior”  
567 metrics. Edge metrics produce higher values for larger and more abrupt differences in



568 brightness values in the computing neighborhood. Interior metrics produce higher values  
569 for smaller and more heterogeneous gradients in brightness values.

570         Of course, edge and interior are highly scale-dependent qualities of an image, as of a  
571 landscape. In a high-resolution image of a forest, a tree crown might be discernable as an  
572 edge, while its constituent branches and leaves compose the interior; in a moderate-  
573 resolution image, only the edges of patches might be discernable, and multiple trees then  
574 make up the interior. It is important, therefore, to identify an appropriate scale for GLCM  
575 computation. Owing to the native resolution of Landsat source data and the focus on  
576 disturbance at the hectare scale or greater, I used a square 3x3 pixel window to define the  
577 computing neighborhood, so that each pixel was compared with its eight edge- and corner-  
578 adjacent neighbors in the frequency calculations. This produced texture measurements at  
579 the approximately one-hectare patch scale.

580         GLCM produces 14 distinct metrics, but many of them are correlated. Including  
581 them all in a classification model would produce redundancies that could reduce model skill  
582 and/or distort the evaluation of variable explanatory power (Kim et al. 2009). Based on  
583 guidance in Hall-Beyer (2017), I identified three theoretically independent measures to  
584 apply in the final analysis (Table 4).

585         *Contrast* measures the intensity contrast between neighboring pixels and tends to be  
586 a reliable edge metric in vegetated landscapes (Hall-Beyer 2017). *Entropy* is also often a  
587 fruitful edge metric, particularly in areas with a high heterogeneity of radiometric  
588 intensities, as in disturbed forest with deadfall, and it may be useful for differentiating  
589 structural randomness from more uniform structures (Haralick et al. 1973). *Correlation* is  
590 an interior metric that captures the prevalence or absence of linear structure. After  
591 computing the texture metrics, I masked out undisturbed pixels and recoded them to a  
592 discrete NA value outside the NIR<sub>v</sub> range.

593 To evaluate possible correlations between the GLCM metrics, the 14 metrics were  
594 paired separately. The Pearson correlation coefficient ( $r$ ) was computed on all pairs and  
595 reported in a correlation matrix. The three proposed measures were confirmed for inclusion  
596 only if they were uncorrelated or weakly correlated (either  $p > 0.01$  or  $r < 0.3$  for significant  
597 correlations).

598 Next, in order to exploit the variability in geometric patterns associated with  
599 different disturbance classes, I used a 3x3 moving window segmentation algorithm to group  
600 pixels disturbed in each year into disturbed patches. I then calculated the perimeter, area,  
601 and fractal dimension of each patch. Fractal dimension is effectively an enhanced  
602 perimeter:area ratio, normalized to the expected ratio of a square and then scaled  
603 logarithmically to reduce the metric's size dependence ( $\ln(0.25 * perimeter) / \ln(area)$ )  
604 (Turner and Gardner 2015).

605

606

607 *2.2.5. Ancillary topographical data*

608         The final step in data preparation was to generate geophysical variables to account  
609 for topographical regulation of forest occurrence and disturbance dynamics. The National  
610 Elevation Dataset Digital Elevation Model (DEM) was resampled to 30-m pixel resolution.  
611 Slope, elevation, sine-transformed aspect and cosine-transformed aspect were computed  
612 and draped over the study site (Beers et al. 1966; Schroeder et al. 2017).

613

614 *2.3. Random Forest classification model*

615         A Random Forest (RF) procedure (Breiman 2001) was used to empirically model the  
616 occurrence of the four classes of disturbance identified in the reference dataset (fire,  
617 harvest, stress, conversion) and stable forest. RF is a non-parametric modeling framework  
618 that takes randomized bootstrap samples of subsets of predictor and response variables and  
619 uses them to construct an ensemble of many slightly different decision trees. When RF is  
620 used for image classification with a categorical response variable, the end-nodes of these  
621 trees comprise a set of potential classification decisions for each pixel. The procedure makes  
622 a final prediction about the correct class through a majority vote. RF was selected on three  
623 criteria. First was its ability to assimilate potentially highly correlated datastreams  
624 without overfitting and, owing to the majority-vote procedure, with only minor bias  
625 concessions. Second was its value-indifference: because the classification ultimately  
626 depends on decision trees, a variable's relative value rather than its absolute magnitude  
627 drives the training decision. Incorporating data of widely different magnitudes does not  
628 therefore force model decisions toward predictors with higher absolute values. And third  
629 was its nearly exclusive use in other disturbance agent-attribution modeling approaches.

630         Two models were developed in R (R Core Team 2014) using the “ModelMap” package  
631 (Freeman et al. 2016), which optimizes ensemble modeling procedures for geospatial

632 analysis. The first model was produced without textural variables and the second with  
633 textural variables included. In both instances, I used the 1000 points sampled from the  
634 reference dataset as trainers, with 200 points in each class. In the first model, 22 predictor  
635 variables were used; in the second model, 31 variables were used (Appendix B). The  
636 predictor sets contained true pixel values for the entire domain in the topographic and  
637 ternary variables. The remaining variables contained true values only for disturbed pixels.  
638 In these cases, the non-disturbed pixels received a discrete NA value outside their true  
639 ranges.

640         In early tuning of the models, different numbers of independent trees (101, 201, 501,  
641 1001, and 2001) were tested incrementally. The number of trees required to stabilize  
642 accuracy and variable importance (i.e., the point where increases in the number of trees did  
643 not affect overall accuracy or predictor importance rank) fell between 201 and 501. The  
644 final models were set to assemble 501 trees. (The extra unit was included to break voting  
645 ties). Eight predictor variables were used per bootstrap run to decide on node splits. This  
646 was based on guidance in Freeman et al. (2016) to begin with a sample size equal to one-  
647 third the number of variables, and then to test increments above and below that number.  
648 Accuracy stabilized when eight variables were selected, so the final models were set to  
649 sample eight variables.

650         The predictors were randomly sampled in the construction of each tree, and all of  
651 the predictors were ultimately used. Maps of disturbance agent predictions at pixel level  
652 were produced in ModelMap.

653

654

655 2.4. *Accuracy assessment and variable importance*

656 Accuracy was assessed at three separate stages. First, the accuracy of disturbance  
657 detection in the temporal segmentation procedure (§2.2.3) was evaluated against a testing  
658 set (§2.2.1). The reference image was reduced by collapsing fire, harvest, and stress into a  
659 single “disturbed” cover class; in the resulting image, all pixels were assigned to one of  
660 three categorical values: stable forest, stable non-forest, and disturbed. A testing set was  
661 created via stratified random sampling of this image, excluding pixels that had been used  
662 in model training. The testing points were interpreted in the same manner as the training  
663 data. The procedure yielded 200 points per class, for a total of 600 testing points. These  
664 points were then used as the basis for comparison with the three cover ternary images  
665 (§2.2.4). Omission and commission errors were calculated for disturbed, stable forest, and  
666 unstable forest, along with overall agreement scores and Cohen’s Kappa ( $\kappa$ ) statistics for  
667 each vegetation index.  $\kappa$  is a multivariate measure of accuracy that accounts for the  
668 possibility of agreement by chance. The coefficient is calculated from the error matrix and  
669 ranges from zero to one, with zero representing random-chance agreement and one  
670 representing perfect agreement. In land-cover classification, generally accepted targets for  
671 each of these metrics are overall accuracy > 85%, per-class accuracy > 70%, and  $\kappa > 0.61$   
672 (Foody 2002).

673 Second, the accuracy of disturbance detection in the RF models (§2.3) was evaluated  
674 against the testing set to quantify any gross information gain or loss that might have been  
675 produced in the RF. In this case, the RF maps were converted to raster format and overlaid  
676 on the ternary reference image to form a multi-band raster. The same testing points were  
677 extracted, and the same bundle of accuracy metrics was produced.

678 Third, the accuracy of disturbance agent-attribution was assessed using out-of-bag  
679 (OOB) estimates. OOB reports the mean prediction error for each training sample,

680 calculated on the trees that were excluded from the bootstrap sampling operation. Because  
681 OOB observations are excluded from model training, they are thought to offer reliable  
682 accuracy estimates. Omission and commission errors, overall agreement, and  $\kappa$  statistics  
683 were measured for both RF models.

684 Mean decrease in accuracy (MDA) was used to evaluate the relative importance of  
685 predictors in the two models. Interpreting the absolute importance of individual predictors  
686 presents challenges in RF models because the procedure reduces hundreds of intermediate  
687 decisions to a single per-pixel vote. MDA, however, enables comparisons of relative variable  
688 importance across trees. The statistic measures how much predictive power would be lost  
689 (i.e., the percent increase in predictive error that would arise) if a variable were removed  
690 from the model. MDA values were computed and ranked for both models. Accuracy and  
691 MDA statistics were compared to evaluate the contribution of textural information to model  
692 skill.

693

### 694 **3. Results**

695

#### 696 *3.1. Texture metric correlations*

697 Correlation testing was performed on the set of 13 GLCM texture metrics to validate  
698 the assumption that contrast, correlation, and entropy were weakly correlated and  
699 therefore contributed independent streams of information to the model. Each GLCM metric  
700 was paired separately with the other 13 in the set, and the correlation coefficient Pearson's  
701  $r$  was computed for each pair. Graphical representations of these correlations appear in Fig.  
702 5. As expected, several of the texture metrics were closely correlated, as indicated by  
703 narrower ellipses and more-saturated colors. For instance, contrast and variance—two  
704 “edge” measures—were well correlated in the data (Pearson's  $r = 0.975$ ;  $p < 0.01$ ). This

705 tends to be the case when a landscape has very clearly defined edges. Where highly  
706 correlated variable pairs are thought to measure similar properties of a landscape, it is  
707 prudent to select only one member of the pair in order to develop a statistically independent  
708 metric set.

709 The three proposed texture metrics—contrast, correlation, and entropy—were  
710 sufficiently weakly correlated to be confirmed for inclusion as textural predictors (Pearson’s  
711  $r < 0.3$ ) (Table 5). Spatially explicit depictions of these metrics calculated on NIRv returns  
712 from 2014 are depicted in Fig. 6 for a 25km<sup>2</sup> subset of the study domain.

713 The reason for selecting independent (or weakly correlated) texture metrics has to do  
714 with how RF handles variable importance for highly correlated predictors (Schroeder et al.  
715 2014, Freeman et al. 2015). One of the advantages of RF is that it can assimilate correlated  
716 variables without sacrificing accuracy or overfitting to the data. A tradeoff, however, is that  
717 it tends to spread out importance across those correlated variables, which makes assessing  
718 relative variable importance difficult. For the purposes of overall model accuracy, this is not  
719 such a problem. But since this study is explicitly testing the importance and contribution of  
720 distinct texture metrics, it was necessary, to the extent possible, to use independent  
721 measures.

722

### 723 3.2. *Disturbance detection: temporal segmentation of vegetation index time series*

724 The percentage of pixels identified as disturbed in the study area each year ranged  
725 widely, from 0.20% in 2011 to 15.6% in 2014 (Fig. 7). The three vegetation indices yielded  
726 similar patterns of detection, with NIRv yielding the greatest total number of disturbed  
727 pixels across all years ( $1.45 \times 10^6$ ) and NDVI the fewest ( $1.36 \times 10^6$ ).

728 The first accuracy assessment was also conducted at this stage. Overall accuracy of  
729 disturbance detection through temporal segmentation of NBR, NDVI, and NIRv time-series

730 stacks ranged from 69.3% to 74.2% (Table 6). All accuracy results were significantly better  
731 than random ( $p < 0.01$ ), and there was no significant difference in accuracy among the three  
732 indices ( $p > 0.01$ ).

733 To enable comparisons among NDVI, NBR, and NIR<sub>v</sub>, their magnitude values were  
734 re-normalized to a 0 – 1 scale. RF is generally scale-indifferent, but normalizing is useful  
735 for comparing mapped values. Histograms and map renderings in Fig. 8 depict the  
736 distribution of normalized magnitudes. NDVI and NBR were similarly distributed with a  
737 mean of 0.291 and 0.266, respectively. NIR<sub>v</sub> was comparatively leptokurtic, with a lower  
738 mean of 0.161.

739

### 740 3.3. *Distribution attribution: Random Forest classification*

741 At this stage, the second accuracy assessment was conducted to determine whether  
742 the RF model yielded any gain or loss of skill over temporal segmentation. Accuracy was  
743 assessed in the same manner as in the first stage, except that reference points were now  
744 compared to RF-modeled images rather than the original temporal-segmentation outputs.  
745 Overall accuracy was 80.0% for Model 1 ( $\kappa = 0.700$ ) and 79.8% for Model 2 ( $\kappa = 0.697$ ), with  
746 no significant difference between the two ( $p > 0.01$ ). However, RF was more adept at  
747 differentiating disturbance, stable forest, and stable non-forest than the temporal  
748 segmentation procedure alone. Overall accuracy increased with RF modeling by between  
749 5.6% and 10.7% ( $p < 0.01$ ).

750 Agent attribution accuracy was then assessed using the RF models' OOB diagnostics  
751 (Table 7). The first model, which excluded textural variables, showed an overall agreement  
752 of 72.0% and  $\kappa = 0.650$ . The second model, which included the texture metrics, had an  
753 overall agreement of 72.2% and  $\kappa = 0.652$ . The difference in accuracy between the models  
754 was insignificant ( $p > 0.01$ ).



755 Omission and commission errors from both models indicated that stress and stable  
756 non-forest had the highest model agreement with reference data (refer to the “CE” column  
757 and “OE” row in Table 7). Model errors for these classes were relatively well balanced—OE  
758 and CE scores fell within  $\pm 10\%$  of each other—which suggests that the model was  
759 appropriately tuned to the data. Stable forest and harvest were also well balanced, but  
760 their errors were higher ( $> 35.0\%$ ), and they were systematically confused with one another  
761 (60 instances in Table 7a and 47 instances in Table 7b). Fire’s accuracy was moderate  
762 (balanced accuracy = 79.8% in Model 1 and 76.0% in Model 2), but it was frequently  
763 confused with all other classes except non-forest, as the false-positive and false-negative  
764 entries along the “Fire” row and column indicate.

765

#### 766 3.4. *Predictor variable importance*

767 Table 8 reports predictor variable importance in terms of the decrease in overall  
768 model accuracy (mean decrease in accuracy, MDA) that would result if a given variable  
769 were excluded from the model. The three most powerful predictors in both models were the  
770 land-cover ternary generated from NDVI segmentation, elevation, and fractal dimension  
771 computed on NDVI. Fractal dimension from all three vegetation indices emerged in the top  
772 15 explainers in both models. In the second model, the texture metrics appeared to promote  
773 the relative importance of slope. While texture metrics added comparatively little  
774 explanatory power, entropy was the highest-ranked contributor of the texture metrics.

775 Notably, in Model 2, the absolute values of predictor MDA decrease for all variables,  
776 despite similar rankings. This suggests that textures are not simply “noisy” predictors but  
777 contribute information to the classification decision; they also appear to balance the overall  
778 distribution of importance across predictors.

779

780 *Spatial predictions of disturbance agents*

781           The predicted forest disturbance agents were mapped alongside stable forest and  
782 non-forest predictions (Fig. 9). The maps confirm that the models were able to distinguish  
783 effectively among disturbance agent classes.

784           The models were particularly sensitive to differences between fire and stress, which  
785 tended to co-occur at lower elevations. However, the error matrices revealed high rates of  
786 false-positive stress identification; this occurred mostly around the margins of fire  
787 perimeters, suggesting that the models may confuse stress with low-intensity fire. In  
788 general, mapped predictions of fire were well resolved and agreed closely with CalFire  
789 FRAP perimeters.

790           The overprediction of harvest identified in the error matrices bears out in the maps.  
791 In reality, harvest is generally constrained between 1000–1500m. Harvest does appear less  
792 frequently in the northern and eastern sections of the maps; these unharvested areas  
793 closely match the Mokelumne, Carson-Iceberg, and Emigrant Wilderness boundaries,  
794 where harvest is proscribed. These areas also occur at higher elevations, which points to  
795 the strong effect of elevation in the models. Notable exceptions are the distinctive narrow  
796 stretches identified as harvest in the easternmost portions of the maps. These follow the  
797 Clark and Middle Forks of the Stanislaus River and are contained within Carson-Iceberg  
798 Wilderness. There is no record of harvest in these areas in the LANDFIRE reference data.

799           Among the predicted disturbance agent classes, harvest was the most prevalent,  
800 followed by fire and stress (Fig. 10). Forest persisted in more than 40% of the area over the  
801 study period. Because the analysis is temporally indifferent and does not account for  
802 regeneration, any pixel identified as disturbed retains this status, regardless of when the  
803 disturbance was detected.

804           Because elevation proved to be a strong predictor, I further analyzed the  
805 relationship between elevation and disturbance agent prevalence (Fig. 11). Stable forest  
806 was widely distributed across elevations up to ~2800m, and non-forest was self-evidently  
807 concentrated at altitudes above 2000m (i.e., exposed granite batholith and alpine vegetation  
808 communities). Harvest appeared to be more constrained to mid-elevations, while fire and  
809 stress tended to co-occur at lower elevations, as is evident in the varying means, *x*-widths  
810 and *y*-densities of the violin plots.

811

## 812 **4. Discussion**

813

### 814 *4.1. Conceptual challenges*

815           As patterns of forest disturbance continue to shift in the Sierra Nevada of California,  
816 it is imperative that forest monitoring programs efficiently and accurately resolve not only  
817 the spatial and temporal qualities of disturbance events, but also their causes. Disturbance  
818 agents have variable impacts on forest composition, structure, and function, and effective  
819 forest management will increasingly depend on robust estimates of prior disturbance-agent  
820 prevalence as well as skillful predictions of future trends. An ideal product to satisfy this  
821 need would be an accurate, full-coverage map of historical disturbance that (a) renders the  
822 events explicitly in space and time, (b) accounts for their drivers, and (c) can be readily  
823 produced and updated with minimal analyst oversight. Achieving such an ideal through a  
824 modeling approach requires overcoming at least three major challenges. First is the basic  
825 difficulty of differentiating change agents (Kennedy et al. 2015). Disturbance is not  
826 inherently related to the spectral signals captured by most remote sensors, and different  
827 agents of disturbance can leave identical spectral signatures. While spectral information  
828 contributes substantially to disturbance detection (Cohen et al. 2018) and goes part of the

829 way toward agent attribution (Schroeder et al. 2017, Shimizu et al. 2019b), additional  
830 information about the landscape and the processes manifest on it is necessary for a reliable  
831 and generalizable approach. A second challenge is spatial scale. Remote sensing operates at  
832 the scale of the pixel and is for the most part limited by the native resolution of satellite  
833 and aerial sensors (although the increasing availability of very high-resolution images and  
834 the promising development of new data fusion methods are rapidly diminishing the size of  
835 this challenge) (Cakir et al. 2006, Khorram et al. 2016). Ecological processes occur at scales  
836 much smaller and much larger than the 30-m pixel used in this study. Disturbances affect  
837 individual trees, and they affect entire landscapes. Reliance on pixel scale means accepting  
838 error at both ends: in generalization of sub-pixel information and in over-specification of  
839 behavior that is in fact occurring across aggregations of pixels. The third challenge has to  
840 do with heterogeneity in the spatial extent, temporal duration, and intensity of  
841 disturbances' impacts on vegetation. Variability in harvest densities, for instance, yields  
842 considerable heterogeneity within what would ideally be considered a uniform category of  
843 change agent. The same can be said for variable-density thinning treatments, species-  
844 selective beetle kill, and fire. Here, I have described an approach that incrementally  
845 advances the field toward addressing these challenges.

846

#### 847 4.2. *Disturbance detection*

848 In simply detecting disturbances, the RF model performed better than the temporal  
849 segmentation procedures run on NDVI, NBR, and NIR<sub>v</sub> time-series stacks. This additional  
850 improvement from RF was likely the result of combining information from multiple spectral  
851 indices. Indeed, this was consistent with recent findings in the literature that combining  
852 multiple indices can yield higher detection accuracy (Kennedy et al. 2015, Schroeder et al.  
853 2017). The hypothesized reason for this effect is that no single index accounts for the full

854 range of spectral behavior in a disturbed forested landscape. The fact that detection  
855 accuracy was not significantly different when any single index was used further confirms  
856 this inference.

857         Given these results, NIR<sub>v</sub> did not appear to aid disturbance detection on its own. It  
858 did not appear to detract either, although the indices were not tested systematically against  
859 one another. NIR<sub>v</sub> captured a broader range of vegetation changes than NDVI and NBR,  
860 based on its greater total identification of disturbed pixels. Higher peaks and positive skew  
861 in the distributions of raw NIR<sub>v</sub> values and  $\Delta$ NIR<sub>v</sub> values suggested that NIR<sub>v</sub> was more  
862 sensitive to subtler negative changes in vegetation than the other two indices were.  
863 However, this behavior may have also been driven by the NIR multiplier in the NIR<sub>v</sub>  
864 calculation or by noisy false-positive detection.

865         In any case, the total number of disturbed pixels identified across the three indices  
866 (Fig. 7) appeared to vary more consistently with year of detection than with index. While  
867 NBR's disturbed total consistently exceeded that of the other two indices in low-disturbance  
868 years, NDVI was anomalously high in 2014 and anomalously low in 2013. NIR<sub>v</sub> total  
869 disturbed was anomalously high in 2013. No ready pattern emerges from this behavior.  
870 However, 2013 and 2014 witnessed the Rim Fire, represented in Fig. 9 by the large swath  
871 of fire-attributed pixels in the southern third of the maps. This was immediately predated  
872 by intense drought-related desiccation stress in 2012–2013. It may be the case that NIR<sub>v</sub> is  
873 more sensitive to stress responses, while NDVI is more sensitive to fire responses. On this  
874 interpretation, NBR's moderate detection of fire may be more accurate. The Rim Fire years  
875 notwithstanding, there was no obvious increasing or decreasing trend in total disturbance  
876 evident over time, though a discernible trend would not necessarily be expected on a 16-  
877 year timescale.

878

879 4.3. *Agent attribution*

880 The procedure appeared to capture the broad categories of disturbance operating in  
881 Stanislaus National Forest between 1999 and 2015. The results underscore the need to  
882 incorporate data beyond first-order spectral-reflectance metrics. Two measures of landscape  
883 position, elevation and slope, ranked among the top five predictors in both models. Their  
884 relative importance is most likely a consequence of how these topographical characteristics  
885 regulate the presence and structure of vegetation. Topography also influences disturbance  
886 processes: harvest tends to occur at lower elevations and on shallower slopes; fire has been  
887 found to spread more rapidly on steeply inclining slopes and to burn more intensely on  
888 steeply declining slopes. Some of the beetle infestations of the early 2010s also occurred  
889 within distinct elevation bands, partially a result of elevational controls on tree species  
890 distributions. Fractal dimension is a landscape shape metric several processing steps  
891 removed from raw spectral returns, yet it was the third strongest explainer in both models.  
892 This hints at the importance of scale in this modeling approach; fractal dimension exploits  
893 the sizes and shapes of disturbed patches, while other predictors in the set primarily act at  
894 the pixel scale. Spatial extent is a key characteristic of disturbance legacies and is  
895 frequently differentiable by agent on the ground. Its appearance as one of the more  
896 important predictors squares with this observation.

897 The overall skill of the model, evaluated in terms of model accuracy (~72%) was  
898 reasonable, but not exceptional. Per-class accuracy ranges between 71% and 100% were on  
899 par with the those in the most successful agent-attribution models in the literature  
900 (Kennedy et al. 2015, Schroeder et al. 2017, Shimizu et al. 2019a). Those studies yielded  
901 higher overall accuracy values than the method in this paper (78–95%). Their  $\kappa$  statistics  
902 ranged between 0.40 and 0.85. In the Schroeder et al. (2017) study, the scene that  
903 overlapped Stanislaus National Forest actually returned the highest accuracy rate (95%) of

904 all of the scenes in their investigation. My results were significantly less robust, despite  
905 similar agent-class groupings, reference data, and input variables in the texture-free model.  
906 One reason for the discrepancy could be that Schroeder et al.'s time series ended in 2010,  
907 before the major drought and Rim Fire; their observations may have included less stress-  
908 related spectral change overall, which may have dampened confusion of stable forest,  
909 harvest, and stress. Another major divergence was that they used VCT for temporal  
910 segmentation; it would be worthwhile to test the impacts of assimilating VCT-derived vs  
911 Landtrendr-derived disturbance metrics for agent attribution in the future.

912         At the class level, considerable confusion arose between stable forest and harvest,  
913 resulting in systematic overprediction of harvest. Commission error for harvest exceeded  
914 0.45 in both models. The confusion here likely results from different mechanical harvest  
915 treatments being compressed into one category. Selective removal and thinning were  
916 grouped together with clear-cuts, a decision that likely expanded the dimensional space for  
917 harvest enough that it caused model votes for harvest to also capture stable forest. The  
918 balanced omission and commission errors for these two classes is a good indicator that this  
919 was the case. A second source of error may have been the masking of stable forest pixels in  
920 several of the predictors (i.e., magnitude, year of detection, rate, fractal dimension, and the  
921 three texture metrics). Masking was the best solution to an intractable dilemma: using full  
922 coverage data for those metrics would have entailed assimilating a separate image for each  
923 year. For the texture metrics alone, this would have yielded 153 distinct images (3 variables  
924 x 3 indices x 17 years), a rate of expansion that would have quickly exhausted available  
925 computing capacity and likely would have biased the model toward the orders-of-magnitude  
926 more prevalent variable types. In fact, in early iterations of the model, I tested this  
927 possibility using full-coverage annual textures for NIRv alone. The model skill was  
928 insignificantly different from the model described in this paper. And although textures did

929 contribute a greater share of predictive power, this likely had more to do with their  
930 dominance of the share of predictors.

931

#### 932 4.4. *Spatial patterns and prospects for application*

933 With the exception of overpredicted harvest, the location and distribution of  
934 attributed change agents cohered with expectations for the study site, from the minimum-  
935 mapping unit scale of one hectare up to the full National Forest scale. The fact that  
936 reasonably accurate disturbance-agent predictions can be made with a very small  
937 proportion of pixels used as training points (0.07% of total) underscores the promise of this  
938 approach for reducing the time and resource requirements of agent-explicit disturbance  
939 detection at the landscape scale.

940

#### 941 4.5. *Contribution of texture metrics*

942 Textures contributed not at all to the absolute accuracy of the models and only  
943 negligibly in terms of the relative importance of predictors. The insignificant results mean  
944 that the null hypothesis cannot be rejected, and that textures have little effect on the  
945 modeling method's predictive skill. Several inferences seem plausible. The first is that  
946 textural information may straightforwardly fail to add power to differentiate among  
947 disturbance legacies. This would seem to be confirmed by the null difference in overall  
948 model accuracy. A second interpretation is that textural information contributes to skill,  
949 but it is a much weaker explainer than the topographic and shape variables that drive most  
950 of the prediction. This would seem to be confirmed by the appearance of the NDVI entropy  
951 metric among the top ten predictors in the second model.

952 One important limitation confronts interpretation of individual predictor  
953 importance. Because of RF's tendency to distribute importance across correlated variables,



954 retaining correlates in the set will also influence the relative importance of independent  
955 metrics. Several of the variables were correlated; most of those derived directly from  
956 temporal segmentation (i.e., the “Disturbance” category in Appendix B) had paired  
957 Pearson’s  $r$  coefficients  $> 0.50$  ( $p < 0.01$ ). On the whole, the texture metrics were not well  
958 correlated with any other variables ( $r < 0.30$ ,  $p < 0.01$ ). One exception was entropy, which  
959 varied with all of the “Disturbance” variables ( $r > 0.50$ ,  $p < 0.01$ ).

960         In the course of this study, I was unable to adjust satisfactorily for this distortion. In  
961 prior disturbance agent attribution studies, authors have either ignored the variable  
962 interdependence problem or computed a rank sum of importance for groupings of correlated  
963 variables (Schroeder et al. 2014); this requires observations from multiple independent  
964 model replicates and so was infeasible for this single-domain study. Another solution might  
965 be to systematically remove variables from correlated pairs. However, exploratory tests of  
966 this approach significantly reduced model skill and so were rejected for this project. A third  
967 option could be to use factor analysis to compress the variable set into a smaller collection  
968 of uncorrelated factors and to rank this smaller collection according to a sum or mean rule.  
969 This seems like a promising direction, but acquiring an honest operational understanding  
970 of factor analysis exceeded the scope of an already capacious project.

971         In sum, while care was taken to identify independent measures of texture in order to  
972 evaluate their importance in comparison with one another, inferences about any variable’s  
973 overall rank in the predictor set may be distorted by interdependences among other  
974 variables. Accordingly, there are limits to the inferences that can be drawn from variable  
975 importance.

976         It may be the case that landscape textures are important for discriminating  
977 disturbance legacies, but that texture was insufficiently operationalized in this study. One  
978 potential weakness was the aforementioned masking of stable forest and stable non-forest

979 in several of the predictors. In future work, it would be advisable to study a smaller area  
980 over a shorter timescale, focusing on pixels where only stable forest and harvest co-occur.  
981 Including full-coverage spectral and textural metrics in this case could improve model skill  
982 markedly.

983 Another underexplored area is the spatial scale of texture computation. The ability  
984 of edge and interior texture metrics to differentiate disturbance agents is necessarily a  
985 function of the scale at which disturbance occurs. Calculated in a 3x3 pixel neighborhood,  
986 contrast was robust to edges of harvested and stressed patches (Fig. 6). Correlation and  
987 entropy were less adept at discriminating among interior behaviors in disturbed and stable  
988 patches. A promising direction for further study would be to evaluate a wider range of  
989 neighborhood sizes. Including 24-neighbor and 224-neighbor iterations, for example, might  
990 help to identify interior patch structures that aren't detectable in an eight-neighbor  
991 window. This information could enhance the contribution of textural metrics.

992 Finally, a major unresolved issue for this study and other agent-attribution  
993 approaches is the lack of an external reference dataset with sufficient temporal and spatial  
994 resolution across the length of the Landsat record to use for independent model training  
995 and validation. This is something of a chicken-and-egg problem. Using incomplete ancillary  
996 datasets and records to manually verify disturbance occurrence and agent class for 1000  
997 training points is a tedious and error-prone exercise that further underscores the need for a  
998 more reliable modeling approach. But in the absence of a valid independent reference, a  
999 generalizable modeling approach remains difficult to achieve. A randomly sampled and  
1000 verified set of retrospective disturbance points with error terms would help to an extent.  
1001 However, because of the conceptual fuzziness of ecological disturbance noted in the  
1002 introduction to this paper, an absolute reference may be inherently elusive, especially for  
1003 agent classes that are difficult to differentiate even through on-the-ground study, such as

1004 drought stress and beetle kill. In light of this constraint, most agent-attribution approaches  
1005 have aimed not for perfect classification agreement, but for improvement over the  
1006 inconsistent and discontinuous data products currently in widespread application in forest  
1007 management. Acknowledging that the approach described here inherits some uncertainty  
1008 from reference data, remotely sensed data, and model decisions alike, it still succeeds on  
1009 this more modest criterion of incremental improvement.

1010

## 1011 **5. Conclusions**

1012

1013 The objective of this project was to develop and test an integrated empirical  
1014 modeling method for attributing forest disturbances to particular agents. The motivation  
1015 was twofold: to advance a burgeoning field of methodological inquiry in the remote sensing  
1016 of forest resources and to enhance the information streams available to resource and  
1017 conservation managers for decision-making regarding disturbance adaptation and  
1018 mitigation. The approach presented here satisfies both. The method yields adequate  
1019 identification of disturbance location and moderate attribution accuracy for multiple  
1020 disturbance agents. While texture as it was operationalized here did not meaningfully  
1021 contribute to model skill, the results further confirm that information beyond spectral  
1022 reflectance records is required for accurate agent attribution. As a proof-of-concept, this  
1023 study offers a strong foundation for future work, which should focus on improving the  
1024 overall efficacy of the models and generalizing them for systems beyond the Central Sierra  
1025 Nevada.

1026

1027 **Literature Cited**

1028

1029 Adams, H. D., M. Guardiola-Claramonte, G. A. Barron-Gafford, J. Camilo Villegas, D. D.

1030 Breshears, C. B. Zou, P. A. Troch, T. E. Huxman, and H. A. Mooney. 2010.

1031 Temperature sensitivity of drought-induced tree mortality portends increased regional

1032 die-off under global-change-type drought. *Proceedings of the National Academy of*

1033 *Sciences of the United States of America* 106:7063–7066.

1034 Allen, C. D., A. K. Macalady, H. Chenchouni, D. Bachelet, N. McDowell, M. Vennetier, T.

1035 Kitzberger, A. Rigling, D. D. Breshears, E. H. Hogg, P. Gonzalez, R. Fensham, Z.

1036 Zhang, J. Castro, N. Demidova, J. H. Lim, G. Allard, S. W. Running, A. Semerci, and

1037 N. Cobb. 2010. A global overview of drought and heat-induced tree mortality reveals

1038 emerging climate change risks for forests. *Forest Ecology and Management* 259:660–

1039 684.

1040 Anderegg, W. R. L., J. A. Hicke, R. A. Fisher, C. D. Allen, J. Aukema, B. Bentz, S. Hood, J.

1041 W. Lichstein, A. K. Macalady, N. McDowell, Y. Pan, K. Raffa, A. Sala, J. D. Shaw, N.

1042 L. Stephenson, C. Tague, and M. Zeppel. 2015. Tree mortality from drought, insects,

1043 and their interactions in a changing climate. *New Phytologist* 208:674–683.

1044 Badgley, G., L. D. L. Anderegg, J. A. Berry, and C. B. Field. 2019. Terrestrial gross primary

1045 production: Using NIRV to scale from site to globe. *Global Change Biology* 25:3731–

1046 3740.

1047 Badgley, G., C. B. Field, and J. A. Berry. 2017. Canopy near-infrared reflectance and

1048 terrestrial photosynthesis. *Science Advances* 3:1–6.

1049 Beisner, B. E., D. T. Haydon, and K. Cuddington. 2003. Alternative stable states in ecology.

1050 *Frontiers in Ecology and the Environment* 1:376–382.

1051 Birdsey, R., A. Dugan, S. Healey, K. Dante-Wood, F. Zhang, J. Chen, A. Hernandez, C.

- 1052 Raymond, and J. McCarter. 2019. Assessment of the influence of disturbance,  
1053 management activities, and environmental factors on carbon stocks of United States  
1054 National Forests. General Technical Report RMRS-GTR-402, U.S. Department of  
1055 Agriculture, Forest Service, Rocky Mountain Research Station. Fort Collins, Colorado,  
1056 USA.
- 1057 Brazionas, K. H., W. D. Hansen, R. Seidl, W. Rammer, and M. G. Turner. 2018. Looking  
1058 beyond the mean: drivers of variability in postfire stand development of conifers in  
1059 Greater Yellowstone. *Forest Ecology and Management* 430:460–471.
- 1060 Breiman, L. 2001. Random forests. *Machine Learning* 45:5–32.
- 1061 Breshears, D. D., N. S. Cobb, P. M. Rich, K. P. Price, C. D. Allen, R. G. Balice, W. H.  
1062 Romme, J. H. Kastens, M. L. Floyd, J. Belnap, J. J. Anderson, O. B. Myers, and C. W.  
1063 Meyer. 2005. Regional vegetation die-off in response to global-change-type drought.  
1064 *Proceedings of the National Academy of Sciences of the United States of America*  
1065 102:15144–15148.
- 1066 Cakir, H. I., S. Khorram, and S. A. C. Nelson. 2006. Correspondence analysis for detecting  
1067 land cover change. *Remote Sensing of Environment* 102:306–317.
- 1068 Christensen, G. A., K. L. Waddell, S. M. Stanton, and O. Kuegler. 2016. California’s forest  
1069 resources: Forest Inventory and Analysis, 2001–2010. General technical report PNW-  
1070 GTR-913. U.S. Department of Agriculture, Forest Service, Pacific Northwest Research  
1071 Station. Portland, Oregon, USA.
- 1072 Ciesla, W. M. 2000. Remote sensing in forest health protection. FHTET Report 00-03.  
1073 Remote U.S. Department of Agriculture, Forest Service, Remote Sensing Applications  
1074 Center. Salt Lake City, Utah, USA.
- 1075 Clark, J. S., L. Iverson, C. W. Woodall, C. D. Allen, D. M. Bell, D. C. Bragg, A. W. D. Amato,  
1076 F. W. Davis, M. H. Hersh, I. Ibanez, S. T. Jackson, S. Matthews, N. Pederson, M.

- 1077 Peters, M. W. Schwartz, K. M. Waring, and N. E. Zimmerman. 2016. The impacts of  
1078 increasing drought on forest dynamics, structure, and biodiversity in the United  
1079 States. *Global Change Biology* 22:2329–2352.
- 1080 Coburn, C. A., and A. C. B. Roberts. 2004. A multiscale texture analysis procedure for  
1081 improved forest stand classification. *International Journal of Remote Sensing* 25:4287–  
1082 4308.
- 1083 Cochrane, M. A., and K. C. Ryan. 2009. Fire and fire ecology: concepts and principles. Pages  
1084 25–62 in M. A. Cochrane, editor. *Tropical fire ecology: climate change, land use, and*  
1085 *ecosystem dynamics*. Praxis Publishing, Chichester, UK.
- 1086 Cohen, W. B., Z. Yang, S. P. Healey, R. E. Kennedy, and N. Gorelick. 2018. A LandTrendr  
1087 multispectral ensemble for forest disturbance detection. *Remote Sensing of*  
1088 *Environment* 205:131–140.
- 1089 Cohen, W. B., Z. Yang, S. V. Stehman, T. A. Schroeder, D. M. Bell, J. G. Masek, C. Huang,  
1090 and G. W. Meigs. 2016. Forest disturbance across the conterminous United States from  
1091 1985–2012: the emerging dominance of forest decline. *Forest Ecology and Management*  
1092 360:242–252.
- 1093 Collins, B. M., and G. B. Roller. 2013. Early forest dynamics in stand-replacing fire patches  
1094 in the northern Sierra Nevada, California, USA. *Landscape Ecology* 28:1801–1813.
- 1095 Conedera, M., W. Tinner, C. Neff, M. Meurer, A. F. Dickens, and P. Krebs. 2009.  
1096 Reconstructing past fire regimes: methods, applications, and relevance to fire  
1097 management and conservation. *Quaternary Science Reviews* 28:555–576.
- 1098 Connell, J. H., and W. P. Sousa. 1983. On the evidence needed to judge ecological stability  
1099 or persistence. *American Naturalist* 121:789–824.
- 1100 Coop, J. D., S. A. Parks, S. R. McClernan, and L. M. Holsinger. 2016. Influences of prior  
1101 wildfires on vegetation response to subsequent fire in a reburned southwestern

- 1102        landscape. *Ecological Applications* 26:346–354.
- 1103   Crockett, J. L., and A. L. Westerling. 2018. Greater temperature and precipitation extremes  
1104        intensify Western U.S. droughts, wildfire severity, and Sierra Nevada tree mortality.  
1105        *Journal of Climate* 31:341–354.
- 1106   Dale, V. H., L. A. Joyce, S. McNulty, R. P. Neilson, M. P. Ayres, M. D. Flannigan, P. J.  
1107        Hanson, L. C. Irland, A. E. Lugo, C. J. Peterson, D. Simberloff, F. J. Swanson, B. J.  
1108        Stocks, and B. Michael Wotton. 2001. Climate change and forest disturbances.  
1109        *BioScience* 51:723–734.
- 1110   Dolanc, C. R., H. D. Safford, S. Z. Dobrowski, and J. H. Thorne. 2014. Twentieth century  
1111        shifts in abundance and composition of vegetation types of the Sierra Nevada, CA, US.  
1112        *Applied Vegetation Science* 17:442–455.
- 1113   Dolanc, C. R., J. H. Thorne, and H. D. Safford. 2013. Widespread shifts in the demographic  
1114        structure of subalpine forests in the Sierra Nevada, California, 1934 to 2007. *Global*  
1115        *Ecology and Biogeography* 22:264–276.
- 1116   Eidenshink, J., B. Schwind, K. Brewer, Z. Zhu, B. Quayle, and S. Howard. 2007. A project  
1117        for monitoring trends in burn severity. *Fire Ecology* 3:3–21.
- 1118   Fettig, C. J., L. A. Mortenson, B. M. Bulaon, and P. B. Foulk. 2019. Tree mortality following  
1119        drought in the central and southern Sierra Nevada, California, U.S. *Forest Ecology*  
1120        *and Management* 432:164–178.
- 1121   Foody, G. M. 2002. Status of land cover classification accuracy assessment. *Remote Sensing*  
1122        *of Environment* 80:185–201.
- 1123   Franklin, J. F., T. A. Spies, R. Van Pelt, A. B. Carey, D. A. Thornburgh, D. R. Berg, D. B.  
1124        Lindenmayer, M. E. Harmon, W. S. Keeton, D. C. Shaw, K. Bible, and J. Chen. 2002.  
1125        Disturbances and structural development of natural forest ecosystems with  
1126        silvicultural implications, using Douglas-fir forests as an example. *Forest Ecology and*

- 1127 Management 155:399–423.
- 1128 Freeman, E. A., T. S. Frescino, and G. G. Moisen. 2016. ModelMap: an R package for model  
1129 creation and map production. <https://cran.r-project.org/web/packages/ModelMap/>  
1130 [%0Avignettes/VModelMap.pdf](https://cran.r-project.org/web/packages/ModelMap/%0Avignettes/VModelMap.pdf).
- 1131 Freeman, E. A., G. G. Moisen, J. W. Coulston, and B. T. Wilson. 2015. Random forests and  
1132 stochastic gradient boosting for predicting tree canopy cover: Comparing tuning  
1133 processes and model performance. *Canadian Journal of Forest Research* 46:323–339.
- 1134 Fukami, T., and M. Nakajima. 2011. Community assembly: alternative stable states or  
1135 alternative transient states? *Ecology Letters* 14:973–984.
- 1136 Fung, T., and E. Ledrew. 1987. Application of principal components analysis to change  
1137 detection. *Photogrammetric Engineering & Remote Sensing* 53:1649–1658.
- 1138 García-Haro, F. J., M. A. Gilabert, and J. Meliá. 2001. Monitoring fire-affected areas using  
1139 Thematic Mapper data. *International Journal of Remote Sensing* 22:533–549.
- 1140 Goodwin, N. R., N. C. Coops, M. A. Wulder, S. Gillanders, T. A. Schroeder, and T. Nelson.  
1141 2008. Estimation of insect infestation dynamics using a temporal sequence of Landsat  
1142 data. *Remote Sensing of Environment* 112:3680–3689.
- 1143 Gorelick, N., M. Hancher, M. Dixon, S. Ilyushchenko, D. Thau, and R. Moore. 2017. Google  
1144 Earth Engine: planetary-scale geospatial analysis for everyone. *Remote Sensing of*  
1145 *Environment* 202:18–27.
- 1146 Goward, S. N., C. Huang, F. Zhao, K. Schleeweis, K. Rishmawi, M. Lindsey, J. L. Dungan,  
1147 and A. Michaelis. 2016. NACP North American Forest Dynamics Project: forest  
1148 disturbance history from Landsat, 1986-2010. ORNL Distributed Active Archive  
1149 Center, Oak Ridge, Tennessee, USA.
- 1150 Hadfield, J. S. 1968. Color infrared photography effectively detects pines killed by *Fomes*  
1151 *annosus*. Pages 37–42 in C. W. . Hodges, J. Risbeth, and A. Yde-Anderson, editors.



- 1152 Proceedings of the Third International Conference on Fomes annosus. U.S.  
1153 Department of Agriculture, Forest Service, Washington, D.C., USA.
- 1154 Hall-Beyer, M. 2017. Practical guidelines for choosing GLCM textures to use in landscape  
1155 classification tasks over a range of moderate spatial scales. *International Journal of*  
1156 *Remote Sensing* 38:1312–1338.
- 1157 Hansen, W. D., and M. G. Turner. 2019. Origins of abrupt change? Postfire subalpine  
1158 conifer regeneration declines nonlinearly with warming and drying. *Ecological*  
1159 *Monographs* 89:e01340.
- 1160 Hanson, J. B., and W. Lautz. 1971. Photography as an aid in estimating Annosus root rot–  
1161 caused tree mortality. *Plant Disease Reporter* 55:761–763.
- 1162 Haralick, R. M., K. Shanmugam, and I. Dinstein. 1973. Textural features for image  
1163 classification. *IEEE Transactions on Systems, Man and Cybernetics* SMC-3:610–621.
- 1164 Hargrove, W., J. P. Spruce, G. E. Gasser, and F. M. Hoffman. 2009. Toward a national early  
1165 warning system for forest disturbances using remotely sensed canopy phenology.  
1166 *Photogrammetric Engineering & Remote Sensing* 75:1150–1156.
- 1167 Heller, R. C., R. C. Aldrich, and W. F. Bailey. 1959. An evaluation of aerial photography for  
1168 detecting southern pine beetle damage. *Photogrammetric Engineering* 25:595–606.
- 1169 Huang, C., S. N. Goward, J. G. Masek, N. Thomas, Z. Zhu, and J. E. Vogelmann. 2010. An  
1170 automated approach for reconstructing recent forest disturbance history using dense  
1171 Landsat time series stacks. *Remote Sensing of Environment* 114:183–198.
- 1172 Iverson, L. R., R. L. Graham, and E. A. Cook. 1989. Applications of satellite remote sensing  
1173 to forested ecosystems. *Landscape Ecology* 3:131–143.
- 1174 Johnstone, J. F., C. D. Allen, J. F. Franklin, L. E. Frelich, B. J. Harvey, P. E. Higuera, M.  
1175 C. Mack, R. K. Meentemeyer, M. R. Metz, G. L. W. Perry, T. Schoennagel, and M. G.  
1176 Turner. 2016. Changing disturbance regimes, ecological memory, and forest resilience.

- 1177           Frontiers in Ecology and the Environment 14:369–378.
- 1178   Keeley, J. E. 2009. Fire intensity, fire severity and burn severity: a brief review and  
1179           suggested usage. *International Journal of Wildland Fire* 18:116–126.
- 1180   Kennedy, R. E., Z. Yang, J. Braaten, C. Copass, N. Antonova, C. Jordan, and P. Nelson.  
1181           2015. Attribution of disturbance change agent from Landsat time-series in support of  
1182           habitat monitoring in the Puget Sound region, USA. *Remote Sensing of Environment*  
1183           166:271–285.
- 1184   Kennedy, R. E., Z. Yang, and W. B. Cohen. 2010. Detecting trends in forest disturbance and  
1185           recovery using yearly Landsat time series: 1. LandTrendr — Temporal segmentation  
1186           algorithms 114:2897–2910.
- 1187   Kennedy, R. E., Z. Yang, N. Gorelick, J. Braaten, L. Cavalcante, W. B. Cohen, and S.  
1188           Healey. 2018. Implementation of the LandTrendr algorithm on Google Earth Engine.  
1189           *Remote Sensing* 10:1–10.
- 1190   Khorram, S., C. F. van der Wiele, F. H. Koch, S. A. C. Nelson, and M. D. Potts. 2016.  
1191           *Principles of applied remote sensing*. Springer Science+Business Media, New York, NY.
- 1192   Kim, M., M. Madden, and T. A. Warner. 2009. Forest type mapping using object-specific  
1193           texture measures from multispectral Ikonos imagery: segmentation quality and image  
1194           classification issues. *Photogrammetric Engineering and Remote Sensing* 75:819–829.
- 1195   Lam, N. S.-N., H. Qiu, D. A. Quattrochi, and C. W. Emerson. 2013. An evaluation of fractal  
1196           methods for characterizing image complexity. *Cartography and Geographic*  
1197           *Information Science* 29:25–35.
- 1198   Larvie, K., T. Moody, J. Axelson, C. Fettig, and P. Cafferata. 2018. Synthesis of research  
1199           into the long-term outlook for Sierra Nevada forests following the current bark beetle  
1200           epidemic. California forestry note 122. California Natural Resources Agency,  
1201           Department of Forestry and Fire Protection. Sacramento, CA, USA.

- 1202 Lu, D., P. Mausel, E. Brondízio, and E. Moran. 2004. Change detection techniques.  
1203 International Journal of Remote Sensing 25:2365–2401.
- 1204 Lund, H. G. 1997. Forestry. Pages 399–440 in W. Philipson, editor. *Manual of Photographic*  
1205 *Interpretation*. 2nd edition. American Society for Photogrammetry & Remote Sensing,  
1206 Bethesda, Maryland, USA.
- 1207 Marceau, D. J., P. J. Howarth, J. M. M. Dubois, and D. J. Gratton. 1990. Evaluation of the  
1208 grey-level co-occurrence matrix method for land-cover classification using SPOT  
1209 imagery. IEEE Transactions on Geoscience and Remote Sensing 28:513–519.
- 1210 McDowell, N. G., N. C. Coops, P. S. A. Beck, J. Q. Chambers, C. Gangodagamage, J. A.  
1211 Hicke, C.-Y. Huang, R. Kennedy, D. J. Krofcheck, M. Litvak, A. J. H. Meddens, J.  
1212 Muss, R. Negrón-Juarez, C. Peng, A. M. Schwantes, J. J. Swenson, L. J. Vernon, A. P.  
1213 Williams, C. Xu, M. Zhao, S. W. Running, and C. D. Allen. 2015. Global satellite  
1214 monitoring of climate-induced vegetation disturbances. Trends in Plant Science  
1215 20:114–123.
- 1216 Millar, C. I., R. D. Westfall, D. L. Delany, M. J. Bokach, A. L. Flint, and L. E. Flint. 2012.  
1217 Forest mortality in high-elevation whitebark pine (*Pinus albicaulis*) forests of eastern  
1218 California, USA; influence of environmental context, bark beetles, climatic water  
1219 deficit, and warming. Canadian Journal of Forest Research 42:749–765.
- 1220 Millar, C., N. L. Stephenson, and S. L. Stephens. 2007. Climate change and forests of the  
1221 future: managing in the face of uncertainty. Ecological Applications 17:2145–2151.
- 1222 Miller, J. D., H. D. Safford, M. Crimmins, and A. E. Thode. 2009. Quantitative evidence for  
1223 increasing forest fire severity in the Sierra Nevada and southern Cascade Mountains,  
1224 California and Nevada, USA. Ecosystems 12:16–32.
- 1225 Neigh, C. S. R., D. K. Bolton, M. Diabate, J. J. Williams, and N. Carvalhais. 2014a. An  
1226 automated approach to map the history of forest disturbance from insect mortality and

- 1227 harvest with landsat time-series data. *Remote Sensing* 6:2782–2808.
- 1228 Neigh, C. S. R., D. K. Bolton, J. J. Williams, and M. Diabate. 2014b. Evaluating an  
1229 automated approach for monitoring forest disturbances in the Pacific Northwest from  
1230 logging, fire and insect outbreaks with landsat time series data. *Forests* 5:3169–3198.
- 1231 Oeser, J., D. Pflugmacher, C. Senf, M. Heurich, and P. Hostert. 2017. Using intra-annual  
1232 Landsat time series for attributing forest disturbance agents in Central Europe.  
1233 *Forests* 8:doi:10.3390/f8070251.
- 1234 Oswalt, S. N., W. B. Smith, P. D. Miles, and S. A. Pugh. 2019. Forest resources of the  
1235 United States, 2017: a technical document supporting the Forest Service 2020 RPA  
1236 Assessment. General Technical Report WO-97. U.S. Department of Agriculture, Forest  
1237 Service. Washington, D.C., USA.
- 1238 Ozdemir, I., A. Mert, and O. Senturk. 2012. Predicting landscape structural metrics using  
1239 ASTER satellite data. *Journal of Environmental Engineering and Landscape  
1240 Management* 20:168–176.
- 1241 Paz-Kagan, T., P. G. Brodrick, N. R. Vaughn, A. J. Das, N. L. Stephenson, K. R. Nydick,  
1242 and G. P. Asner. 2017. What mediates tree mortality during drought in the southern  
1243 Sierra Nevada? *Ecological Applications* 27:2443–2457.
- 1244 Perry, D. A., P. F. Hessburg, C. N. Skinner, T. A. Spies, S. L. Stephens, A. H. Taylor, J. F.  
1245 Franklin, B. McComb, and G. Riegel. 2011. The ecology of mixed severity fire regimes  
1246 in Washington, Oregon, and Northern California. *Forest Ecology and Management*  
1247 262:703–717.
- 1248 Peters, D. P. C., A. E. Lugo, F. S. Chapin, S. T. A. Pickett, M. Duniway, A. V. Rocha, F. J.  
1249 Swanson, C. Laney, and J. Jones. 2011. Cross-system comparisons elucidate  
1250 disturbance complexities and generalities. *Ecosphere* 2:1–26.
- 1251 Potter, C. 2014. Ten years of forest cover change in the Sierra Nevada detected using

- 1252 Landsat satellite image analysis. *International Journal of Remote Sensing* 35:7136–  
1253 7153.
- 1254 Potter, C., V. Genovese, P. Gross, S. Boriah, M. Steinbach, and V. Kumar. 2007. Revealing  
1255 land cover change in California with satellite data. *Eos* 88:269–276.
- 1256 Potter, C. S. 2017. Satellite image mapping of tree mortality in the Sierra Nevada region of  
1257 California from 2013 to 2016. *Journal of Biodiversity Management & Forestry*  
1258 6:10.4172/2327-4417.1000176.
- 1259 R Core Team. 2014. R: a language and environment for statistical computing. R Foundation  
1260 for Statistical Computing, Vienna, Austria. <http://www.r-project.org/>.
- 1261 Rollins, M. G. 2009. LANDFIRE: A nationally consistent vegetation, wildland fire, and fuel  
1262 assessment. *International Journal of Wildland Fire* 18:235–249.
- 1263 Rouse, J. W., R. H. Hass, J. A. Schell, and D. W. Deering. 1974. Monitoring vegetation  
1264 systems in the great plains with ERTS. Pages 309–317 *in* S. C. Freden, E. P. Mercanti,  
1265 and M. A. Becker, editors. *Third Earth Resources Technology Satellite-1 (ERTS)*  
1266 *Symposium Vol. 1: Technical Presentations*. NASA Goddard Space Flight Center,  
1267 Greenbelt, Maryland, USA.
- 1268 Roy, D. P., V. Kovalskyy, H. K. Zhang, E. F. Vermote, L. Yan, S. S. Kumar, and A. Egorov.  
1269 2016. Characterization of Landsat-7 to Landsat-8 reflective wavelength and  
1270 normalized difference vegetation index continuity. *Remote Sensing of Environment*  
1271 185:57–70.
- 1272 Schmidt, C. 2014. Challenges to Sierra Nevada forests and their local communities: an  
1273 observational and modeling perspective (Dissertation). University of California, Santa  
1274 Cruz.
- 1275 Schroeder, T. A., S. P. Healey, G. G. Moisen, T. S. Frescino, W. B. Cohen, C. Huang, R. E.  
1276 Kennedy, and Z. Yang. 2014. Improving estimates of forest disturbance by combining

- 1277 observations from Landsat time series with U.S. Forest Service Forest Inventory and  
1278 Analysis data. *Remote Sensing of Environment* 154:61–73.
- 1279 Schroeder, T. A., K. G. Schleeweis, G. G. Moisen, C. Toney, W. B. Cohen, E. A. Freeman, Z.  
1280 Yang, and C. Huang. 2017. Testing a Landsat-based approach for mapping disturbance  
1281 causality in U.S. forests. *Remote Sensing of Environment* 195:230–243.
- 1282 Seidl, R., and W. Rammer. 2017. Climate change amplifies the interactions between wind  
1283 and bark beetle disturbances in forest landscapes. *Landscape Ecology* 32:1485–1498.
- 1284 Senf, C., D. Pflugmacher, M. A. Wulder, and P. Hostert. 2015. Characterizing spectral-  
1285 temporal patterns of defoliator and bark beetle disturbances using Landsat time  
1286 series. *Remote Sensing of Environment* 170:166–177.
- 1287 Shimizu, K., O. S. Ahmed, R. Ponce-Hernandez, T. Ota, Z. C. Win, N. Mizoue, and S.  
1288 Yoshida. 2017. Attribution of disturbance agents to forest change using a Landsat time  
1289 series in tropical seasonal forests in the Bago Mountains, Myanmar. *Forests* 8:1–16.
- 1290 Shimizu, K., T. Ota, and N. Mizoue. 2019a. Detecting forest changes using dense Landsat 8  
1291 and Sentinel-1 time series data in tropical seasonal forests. *Remote Sensing* 11:1–22.
- 1292 Shimizu, K., T. Ota, N. Mizoue, and S. Yoshida. 2019b. A comprehensive evaluation of  
1293 disturbance agent classification approaches: strengths of ensemble classification,  
1294 multiple indices, spatio-temporal variables, and direct prediction. *Journal of*  
1295 *Photogrammetry and Remote Sensing* 158:99–112.
- 1296 Shive, K. L., H. K. Preisler, K. R. Welch, H. D. Safford, R. J. Butz, K. L. O’Hara, and S. L.  
1297 Stephens. 2018. From the stand scale to the landscape scale: predicting the spatial  
1298 patterns of forest regeneration after disturbance. *Ecological Applications* 28:1626–  
1299 1639.
- 1300 Simler, A. B., M. R. Metz, K. M. Frangioso, R. K. Meentemeyer, and D. M. Rizzo. 2018.  
1301 Novel disturbance interactions between fire and an emerging disease impact survival

- 1302 and growth of resprouting trees. *Ecology* 99:2217–2229.
- 1303 Sousa, W. P. 1984. The role of disturbance in natural communities. *Annual Review of*  
1304 *Ecology and Systematics* 15:353–391.
- 1305 Tappeiner, J., D. Maguire, T. B. Harrington, and J. D. Bailey. 2015. *Silviculture and*  
1306 *ecology of western U.S. forests*. 2nd edition. Oregon State University Press, Corvallis,  
1307 Oregon, USA.
- 1308 Thorne, J. H., H. Choe, R. M. Boynton, J. Bjorkman, W. Albright, K. Nydick, A. L. Flint, L.  
1309 E. Flint, and M. W. Schwartz. 2017. The impact of climate change uncertainty on  
1310 California’s vegetation and adaptation management. *Ecosphere* 8.
- 1311 Thorne, J. H., H. Choe, P. A. Stine, J. C. Chambers, A. Holguin, A. C. Kerr, and M. W.  
1312 Schwartz. 2018. Climate change vulnerability assessment of forests in the Southwest  
1313 USA. *Climatic Change* 148:387–402.
- 1314 Trauernicht, C., B. W. Brook, B. P. Murphy, G. J. Williamson, and D. M. J. S. Bowman.  
1315 2015. Local and global pyrogeographic evidence that indigenous fire management  
1316 creates pyrodiversity. *Ecology and Evolution* 5:1908–1918.
- 1317 Trumbore, S., P. Brando, and H. Hartmann. 2015. Forest health and global change. *Science*  
1318 349:814–818.
- 1319 Turner, M. G. 2010. Disturbance and landscape dynamics in a changing world. *Ecology*  
1320 91:2833–2849.
- 1321 Turner, M. G., and R. H. Gardner. 2015. *Landscape ecology in theory and practice: pattern*  
1322 *and process*. 2nd edition. Springer-Verlag, New York, New York, USA.
- 1323 Vicuna, S., and J. A. Dracup. 2007. The evolution of climate change impact studies on  
1324 hydrology and water resources in California. *Climatic Change* 82:327–350.
- 1325 Vogelmann, J. E., S. Howard, M. G. Rollins, J. R. Kost, B. Tolk, K. Short, X. Chen, K. Pabst,  
1326 and C. Huang. 2011. Monitoring landscape change for LANDFIRE using multi-

- 1327           temporal satellite imagery and ancillary data. *IEEE Journal of Selected Topics in*  
1328           *Applied Earth Observations and Remote Sensing* 4:252–264.
- 1329 Vogelmann, J. E., B. Tolk, and Z. Zhu. 2009. Monitoring forest changes in the southwestern  
1330           United States using multitemporal Landsat data. *Remote Sensing of Environment*  
1331           113:1739–1748.
- 1332 Vogelmann, J. E., G. Xian, C. Homer, and B. Tolk. 2012. Monitoring gradual ecosystem  
1333           change using Landsat time series analyses: case studies in selected forest and  
1334           rangeland ecosystems. *Remote Sensing of Environment* 122:92–105.
- 1335 Wear, J. F., R. B. Pope, and P. W. Orr. 1966. Aerial photographic techniques for estimating  
1336           damage by insects in western forests. U.S. Department of Agriculture, Forest Service,  
1337           Pacific Northwest Forest and Range Experiment Station. Portland, Oregon, USA.
- 1338 Wood, E. M., A. M. Pidgeon, V. C. Radeloff, and N. S. Keuler. 2012. Image texture as a  
1339           remotely sensed measure of vegetation structure. *Remote Sensing of Environment*  
1340           121:516–526.
- 1341 Wu, G., K. Guan, C. Jiang, B. Peng, H. Kimm, M. Chen, X. Yang, S. Wang, A. E. Sukyer, C.  
1342           Bernacchi, C. E. Moore, Y. Zeng, J. Berry, and M. P. Cendrero-Mateo. 2020. Radiance-  
1343           based NIRv as a proxy for GPP of corn and soybean. *Environmental Research Letters*  
1344           15:034009.
- 1345 Zwanenburg, A., S. Leger, M. Vallières, and S. Löck. 2016. Image biomarker  
1346           standardisation initiative. *ArXiv:1612.07003*.
- 1347



1348 **Table 1.** Recent temporal segmentation procedures for discriminating abrupt and trend  
1349 vegetation change using remotely sensed data.  
1350

| Acronym    | Name                                                          | Year | Citation                      |
|------------|---------------------------------------------------------------|------|-------------------------------|
| BFAST      | Breaks for Additive and Seasonal Trend                        | 2010 | <i>Verbesselt et al. 2010</i> |
| LandTrendr | Landsat-based Detection of Trends in Disturbance and Recovery | 2010 | <i>Kennedy et al. 2010</i>    |
| DBEST      | Detecting Breakpoints and Estimating Segments in Trend        | 2015 | <i>Jamali et al. 2015</i>     |
| MTHD       | Multi-Target Hierarchical Detection                           | 2016 | <i>Xu et al. 2016</i>         |

1351

1352 **Table 2.** The three vegetation indices applied in the temporal segmentation procedure,  
1353 with their respective calculations and Landsat 7 Thematic Mapper (TM) band inputs.  
1354

| <b>Index</b>     | <b>Calculation</b>                                                          | <b>Landsat 7 TM Bands</b>                                              |
|------------------|-----------------------------------------------------------------------------|------------------------------------------------------------------------|
| NDVI             | $\frac{\text{NIR} - \text{Red}}{\text{NIR} + \text{Red}}$                   | $\frac{\text{B4} - \text{B3}}{\text{B4} + \text{B3}}$                  |
| NBR              | $\frac{\text{NIR} - \text{SWIR}}{\text{NIR} + \text{SWIR}}$                 | $\frac{\text{B4} - \text{B7}}{\text{B4} + \text{B7}}$                  |
| NIR <sub>v</sub> | $\frac{\text{NIR} - \text{Red}}{\text{NIR} + \text{Red}} \times \text{NIR}$ | $\frac{\text{B4} - \text{B3}}{\text{B4} + \text{B3}} \times \text{B4}$ |

1355

1356 **Table 3.** Definitions of pixel trajectory metrics: year of detection, magnitude, disturbance  
1357 signal-to-noise ratio, duration, and rate. Metrics were derived through temporal  
1358 segmentation of vegetation index time series.  
1359

| <b>Metric</b>                     | <b>Definition</b>                                                                |
|-----------------------------------|----------------------------------------------------------------------------------|
| Year of detection                 | Year in which a directional change (vertex) occurred                             |
| Magnitude                         | Value of change in spectral response                                             |
| Disturbance signal-to-noise ratio | Magnitude normalized to the root mean squared error (RMSE) of the LandTrendr fit |
| Duration                          | Horizontal length of the segment                                                 |
| Rate of change                    | Magnitude / Duration                                                             |

1360

1361 **Table 4.** Three theoretically independent metrics for quantifying textural characteristics in  
1362 forest remote sensing applications.  
1363

| Metric      | Equation                                                              | Description                                                                 |
|-------------|-----------------------------------------------------------------------|-----------------------------------------------------------------------------|
| Contrast    | $\sum_{i,j}^N p(i,j) i-j ^2$                                          | Sum of squares of variance in grey-level values between adjacent pixels.    |
| Correlation | $\sum_{i,j}^N \frac{(i - \mu_i)(j - \mu_j)p(i,j)}{\sigma_i \sigma_j}$ | Linear dependence of grey-level values on those of neighboring pixels.      |
| Entropy     | $\sum_{i,j=0}^{N-1} -\ln(p(i,j))p(i,j)$                               | Natural log of the probability of co-occurrence of equal grey-level values. |

1364

1365 **Table 5.** Pearson's correlation coefficients for selected GLCM texture metrics.

| <b>Variable Pair</b> | <b>Pearson's <i>r</i></b> |
|----------------------|---------------------------|
| con-cor              | 0.1397***                 |
| con-ent              | 0.0185***                 |
| cor-ent              | 0.0869***                 |

\*\*\* p < 0.01

1366

1367 **Table 6.** Disturbance detection accuracy and Cohen's Kappa ( $\kappa$ ) when NBR, NDVI, and  
1368 NIR<sub>v</sub> were assimilated separately in the temporal segmentation procedure.  
1369

| <b>Index</b>     | <b>Accuracy</b> | <b><math>\kappa</math></b> |
|------------------|-----------------|----------------------------|
| NBR              | 70.4%           | 0.537                      |
| NDVI             | 74.2%           | 0.598                      |
| NIR <sub>v</sub> | 69.3%           | 0.527                      |

1370

1371 **Table 7.** Error matrices for RF classification models: (a) Model 1 (texture metrics excluded)  
 1372 and (b) Model 2 (texture metrics included). Within the shaded box, numbers in cells  
 1373 represent the count of sample pixels in each category. Column values represent  
 1374 observations in the reference data and all sum to 200 pixels per class. Row values represent  
 1375 modeled agent predictions and sum to total predictions for that class. Diagonal (darker)  
 1376 cells contain correct identifications; off-diagonal (lighter) cells contain errors. Row and  
 1377 column totals, omission errors (OE), and commission errors (CE) appear in italics.  
 1378 Commission error is calculated as the sum of false-positive predictions (row errors) over  
 1379 total predictions per class. Omission error is calculated as the sum of false-negative  
 1380 predictions (column errors) over total reference points per class. The proportion of pixels  
 1381 correctly classified (PCC) appears in the bottom-right cell of each matrix.  
 1382

1383 **(a) Model 1: GLCM texture variables excluded**

|              |                   | Reference    |              |              |               |                   | <i>Total</i> | <i>CE</i>           |
|--------------|-------------------|--------------|--------------|--------------|---------------|-------------------|--------------|---------------------|
|              |                   | Fire         | Harvest      | Stress       | Stable forest | Stable non-forest |              |                     |
| Predicted    | Fire              | 111          | 31           | 12           | 13            | 0                 | <i>167</i>   | <i>0.335</i>        |
|              | Harvest           | 36           | 105          | 4            | 56            | 0                 | <i>201</i>   | <i>0.478</i>        |
|              | Stress            | 31           | 4            | 178          | 5             | 0                 | <i>218</i>   | <i>0.183</i>        |
|              | Stable forest     | 22           | 60           | 6            | 126           | 0                 | <i>214</i>   | <i>0.411</i>        |
|              | Stable non-forest | 0            | 0            | 0            | 0             | 200               | <i>200</i>   | <i>0.000</i>        |
| <i>Total</i> |                   | <i>200</i>   | <i>200</i>   | <i>200</i>   | <i>200</i>    | <i>200</i>        | <i>1000</i>  | <i>PCC</i>          |
| <i>OE</i>    |                   | <i>0.445</i> | <i>0.475</i> | <i>0.110</i> | <i>0.370</i>  | <i>0.000</i>      | <i>PCC</i>   | <b><i>0.720</i></b> |

1384

1385

1386

1387

**(b) Model 2: texture variables included**

|                  |                   | Reference |         |        |               |                   | <i>Total</i> | <i>CE</i>    |
|------------------|-------------------|-----------|---------|--------|---------------|-------------------|--------------|--------------|
|                  |                   | Fire      | Harvest | Stress | Stable forest | Stable non-forest |              |              |
| <b>Predicted</b> | Fire              | 110       | 28      | 10     | 14            | 0                 | 162          | 0.321        |
|                  | Harvest           | 36        | 120     | 7      | 70            | 0                 | 233          | 0.485        |
|                  | Stress            | 35        | 5       | 179    | 3             | 0                 | 222          | 0.194        |
|                  | Stable forest     | 19        | 47      | 4      | 113           | 0                 | 183          | 0.383        |
|                  | Stable non-forest | 0         | 0       | 0      | 0             | 200               | 200          | 0.000        |
|                  | <i>Total</i>      | 200       | 200     | 200    | 200           | 200               | 1000         | <i>PCC</i>   |
|                  | <i>OE</i>         | 0.450     | 0.400   | 0.105  | 0.435         | 0.000             | <i>PCC</i>   | <b>0.722</b> |

1388



1389 **Table 8.** Relative importance of the top 15 predictor variables in Model 1 (textures  
 1390 excluded) and Model 2 (textures included). Importance is expressed in terms of mean  
 1391 decrease in accuracy (MDA), the accuracy penalty that would result if a variable were  
 1392 excluded from the set of predictors. Texture variables that appeared in the top 15 for Model  
 1393 2 are in **bold** type.  
 1394

| Model 1: texture metrics excluded |                                        |      | Model 2: texture metrics included  |             |
|-----------------------------------|----------------------------------------|------|------------------------------------|-------------|
| Rank                              | Variable                               | MDA  | Variable                           | MDA         |
| 1                                 | NDVI ternary                           | 67.9 | NDVI ternary                       | 39.2        |
| 2                                 | Elevation                              | 53.2 | Elevation                          | 37.1        |
| 3                                 | NDVI fractal dimension                 | 35.1 | NDVI fractal dimension             | 24.0        |
| 4                                 | NDVI disturbance rate                  | 28.7 | Slope                              | 21.7        |
| 5                                 | Slope                                  | 25.4 | NIR <sub>v</sub> ternary           | 20.8        |
| 6                                 | NIR <sub>v</sub> fractal dimension     | 21.2 | NDVI disturbance magnitude         | 17.9        |
| 7                                 | NDVI disturbance magnitude             | 20.5 | NDVI disturbance rate              | 17.7        |
| 8                                 | NIR <sub>v</sub> ternary               | 19.2 | NDVI disturbance year              | 17.6        |
| 9                                 | NBR disturbance rate                   | 18.9 | NIR <sub>v</sub> fractal dimension | 15.6        |
| 10                                | NDVI disturbance year                  | 18.4 | <b>NDVI entropy</b>                | <b>15.4</b> |
| 11                                | NIR <sub>v</sub> disturbance magnitude | 16.9 | NBR ternary                        | 15.0        |
| 12                                | NBR fractal dimension                  | 16.5 | NBR fractal dimension              | 14.3        |
| 13                                | NBR disturbance magnitude              | 15.2 | <b>NIR<sub>v</sub> contrast</b>    | <b>14.2</b> |
| 14                                | NBR dsnr                               | 14.6 | NIR <sub>v</sub> disturbance rate  | 13.9        |
| 15                                | NIR <sub>v</sub> disturbance rate      | 14.2 | <b>NIR<sub>v</sub> entropy</b>     | <b>13.9</b> |

1395

1396 **Figure Legends**

1397

1398 **Figure 1.** Photographs of Sierra Nevada mixed-conifer forest sites disturbed by (a) mixed-  
1399 severity fire, (b) bark beetles, and (c) harvest. Each photograph was made within one year  
1400 of disturbance and reveals a distinctive structural legacy.

1401

1402 **Figure 2.** True-color composite image of Stanislaus National Forest in July 2014  
1403 (California, U.S.A., inset). The composite was created from bands 2–4 of a Landsat 8  
1404 Enhanced Thematic Mapper (ETM+) image made approximately eleven months after the  
1405 Rim Fire began. The fire scar is visible across the image’s lower third. Extensive harvest  
1406 patches (~16 hectares each) appear in the speckled regions to the north and west. Surface  
1407 water and cloud shadows are masked and appear white.

1408

1409 **Figure 3.** A flowchart of the data processing methods detailed in this study. Steps 1–3  
1410 pertain to §2.2.2. Step 4 is described in §2.2.3. Steps 5–8 are detailed in §2.2.4 and §2.2.5.  
1411 Step 9 is described in §2.3, and Step 10 in §2.4.

1412

1413 **Figure 4.** NIR<sub>v</sub> and best-fit spectral trajectories of randomly selected pixels in three  
1414 possible trajectory groups: “Disturbed”, “Stable Forest”, and “Stable Non-Forest.” Red lines  
1415 indicate spectral trajectory based on observed NIR<sub>v</sub> values. Blue lines represent the model  
1416 that best simplified the trajectory shape based on thresholds defined in the temporal  
1417 segmentation procedure.

1418

1419 **Figure 5.** Graphical representations of the correlation coefficient Pearson’s  $r$  calculated for  
1420 pairs of GLCM texture metrics for 1999–2015 vegetation index values. Blue values indicate

1421 positive correlation; red, negative correlation. Ellipse width and color saturation indicate  
1422 the strength of the relationship. Here, the metrics contrast (con), correlation (cor), and  
1423 entropy (ent) were selected for inclusion as robust independent measures of edge, interior  
1424 structure, and interior randomness, respectively. Names and variable definitions for the  
1425 predictor codes are in Appendix A.

1426

1427 **Figure 6.** A true-color composite (a) shown alongside three GLCM texture metrics for a 25  
1428 km<sup>2</sup> subset of the study domain. Contrast (b), correlation (c), and entropy (d) were  
1429 calculated on NIR<sub>v</sub> returns for 2014. The approximate location of the subset area within the  
1430 Stanislaus National Forest boundary appears in the centered map.

1431

1432 **Figure 7.** Pixels identified as disturbed as a proportion of total within Stanislaus National  
1433 Forest boundaries. Disturbance was detected through a temporal segmentation procedure  
1434 run on time-series stacks of NBR, NDVI, and NIR<sub>v</sub> values, which were computed on annual  
1435 composites of Landsat observations from 1999–2015.

1436

1437 **Figure 8.** Magnitude of greatest disturbance events shown in histograms (a–c) and mapped  
1438 at 30-m pixel scale (d–f) within the Stanislaus National Forest boundary. Disturbance  
1439 location and magnitude were identified by temporal segmentation of NDVI, NIR<sub>v</sub>, and NBR  
1440 time-series.

1441

1442 **Figure 9.** Mapped predictions of disturbance agents: (a) Model 1 (texture metrics excluded)  
1443 and (b) Model 2 (texture metrics included).

1444

1445 **Figure 10.** Proportion of pixels in modeled results by predicted disturbance agent or stable  
1446 status.

1447

1448 **Figure 11.** Violin plots depict elevational regulation of different disturbance agents and  
1449 forest cover. “Wider” oblongs indicate more peaked distributions in one or more elevational  
1450 bands, while “taller” oblongs indicate a more uniform distribution along the elevational  
1451 gradient. Fire and stress appear to co-occur at lower elevations, while harvest is  
1452 concentrated in mid-elevations. The white boxes in the centers of the oblongs depict the  
1453 median and interquartile range of elevation.

1454

1455 **Figure 1.**

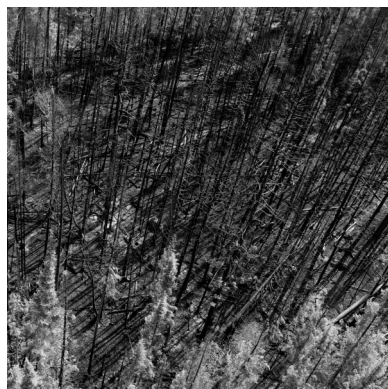

(a)

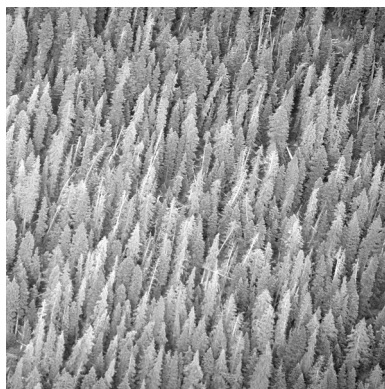

(b)

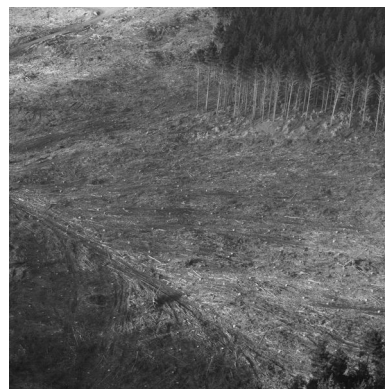

(c)

1456

1457 **Figure 2.**

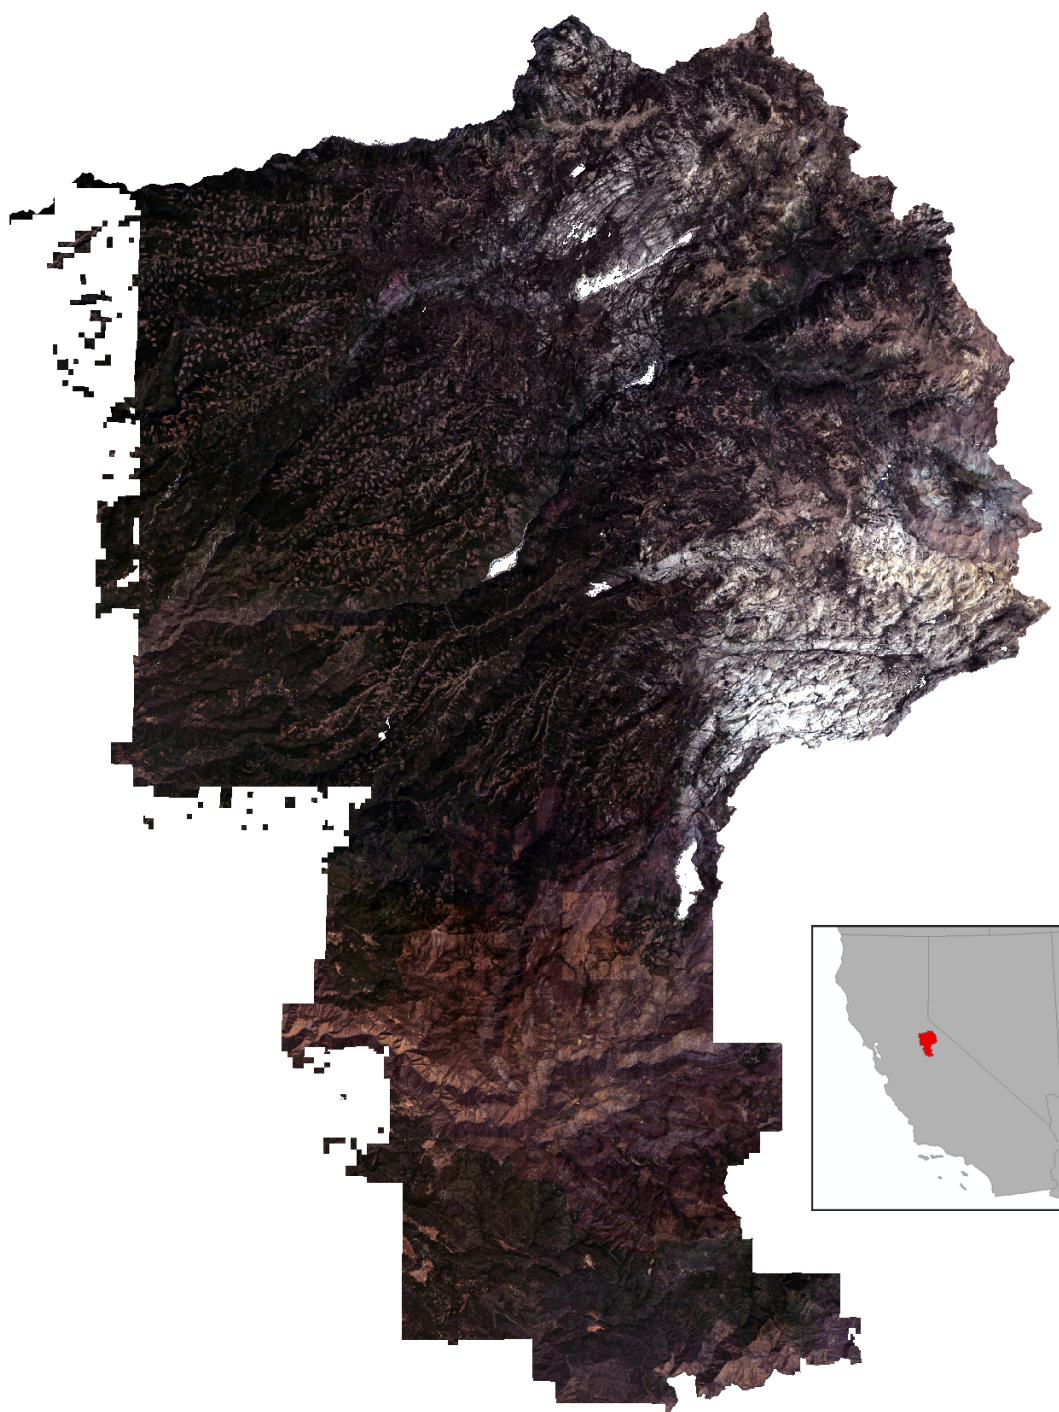

1458

1459

1460 **Figure 3.**

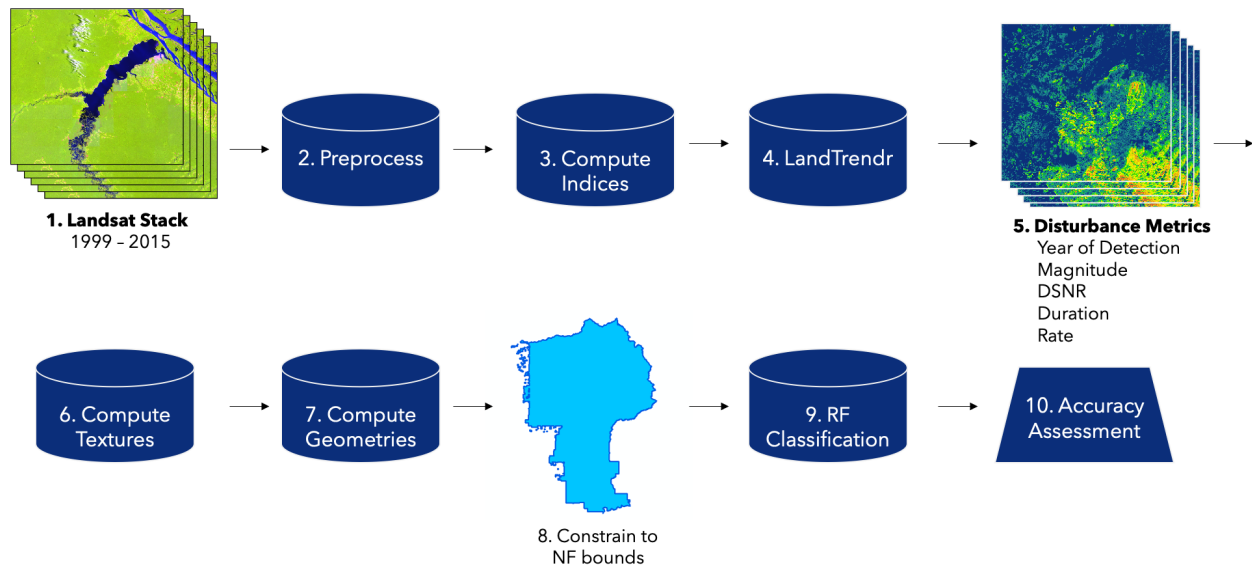

1461

1462

1463 **Figure 4.**

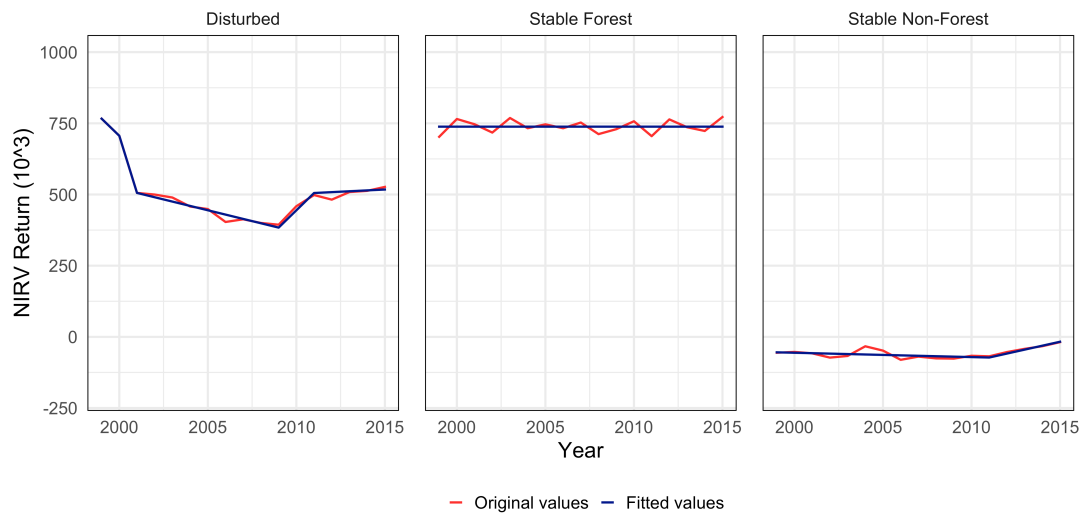

1464

1465



1466 **Figure 5.**

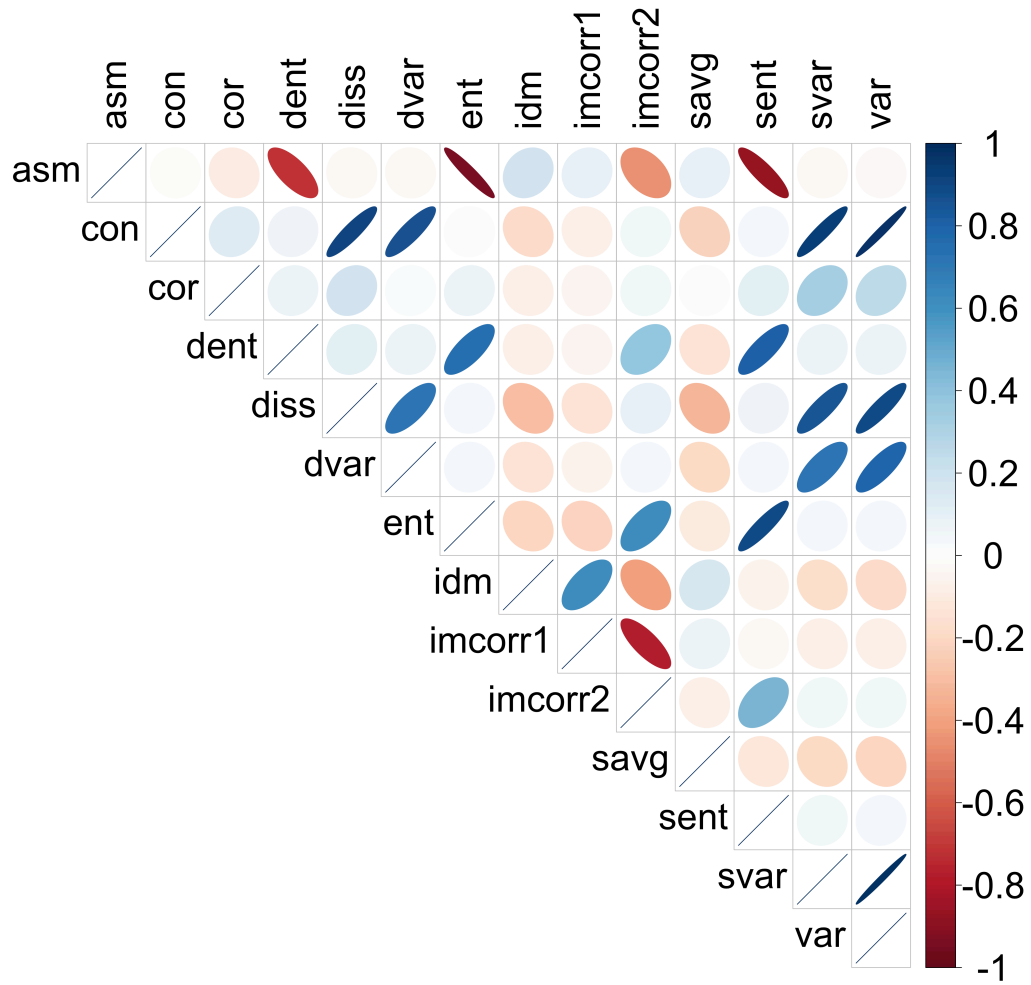

1467

1468 **Figure 6.**

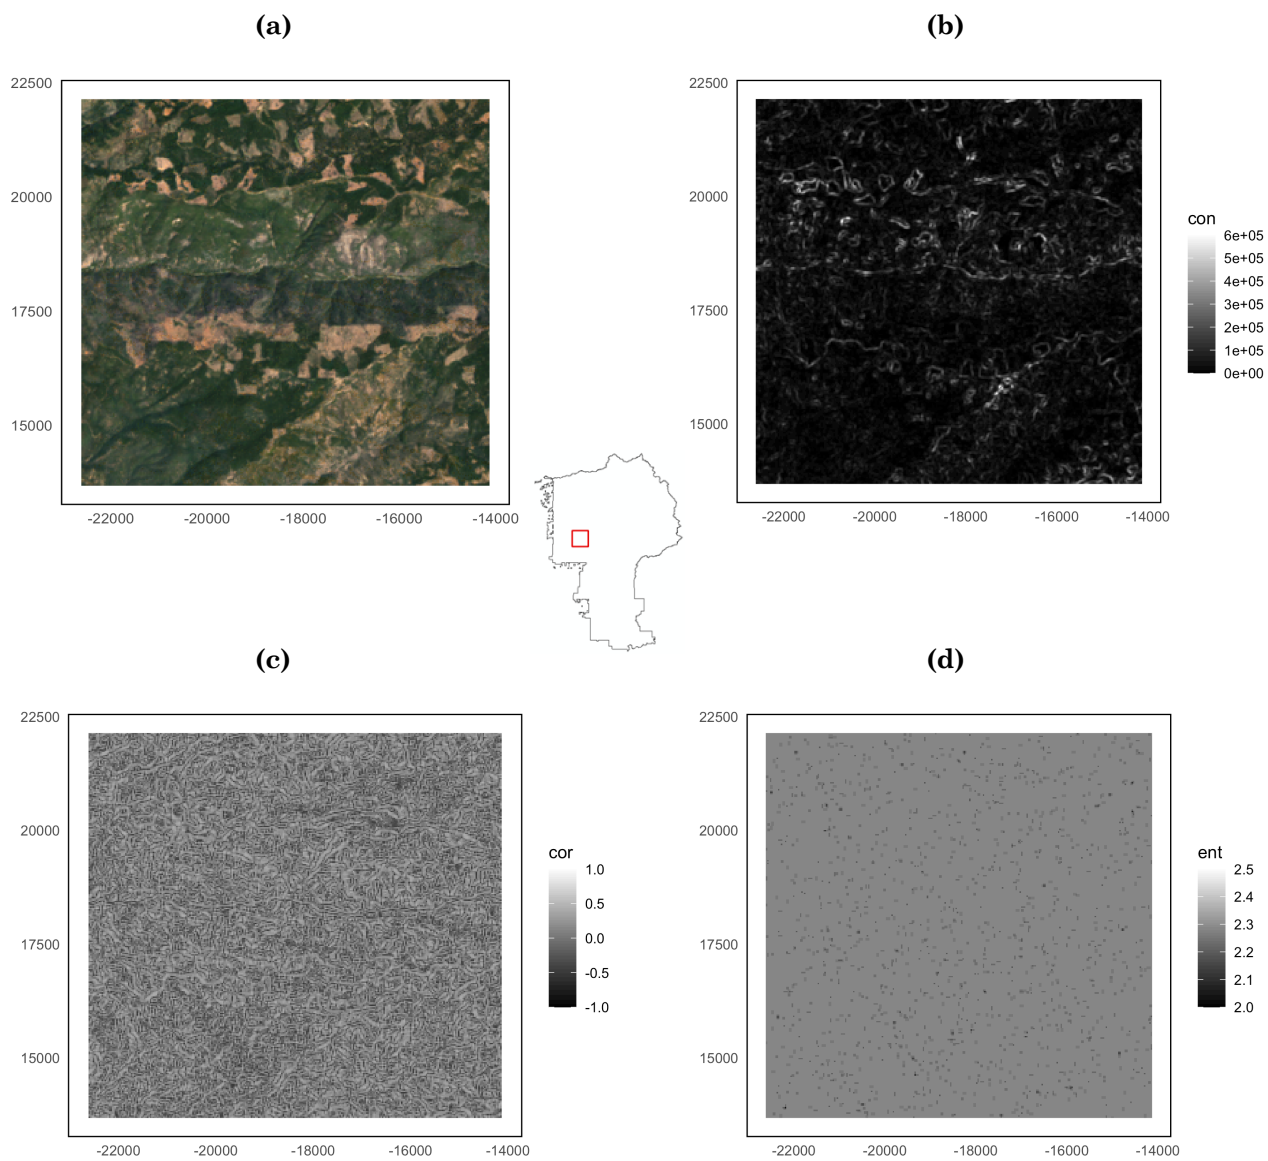

1469

1470 **Figure 7.**

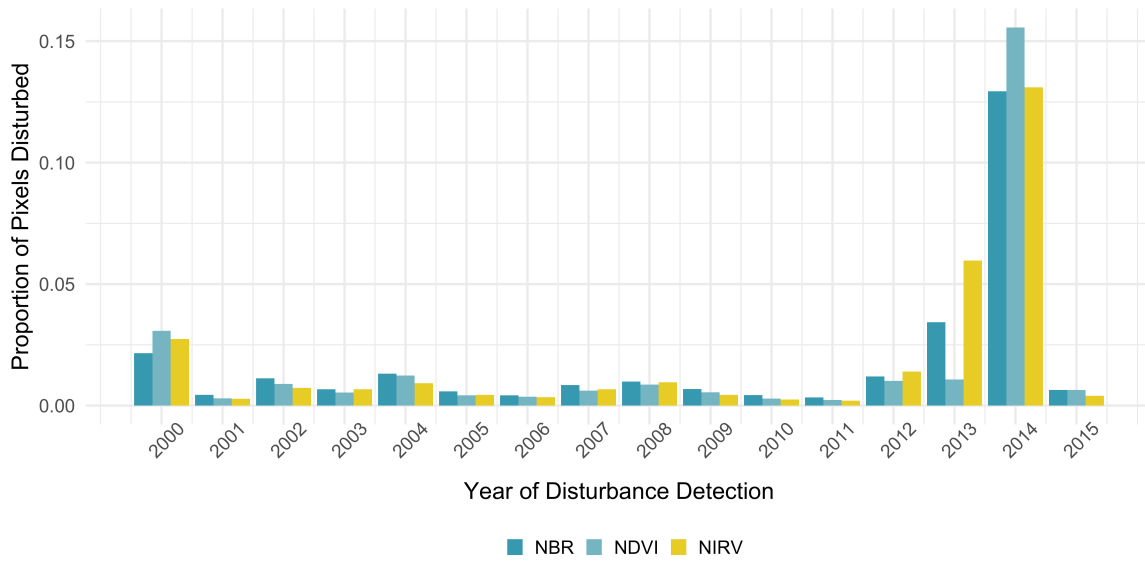

1471

1472 **Figure 8.**

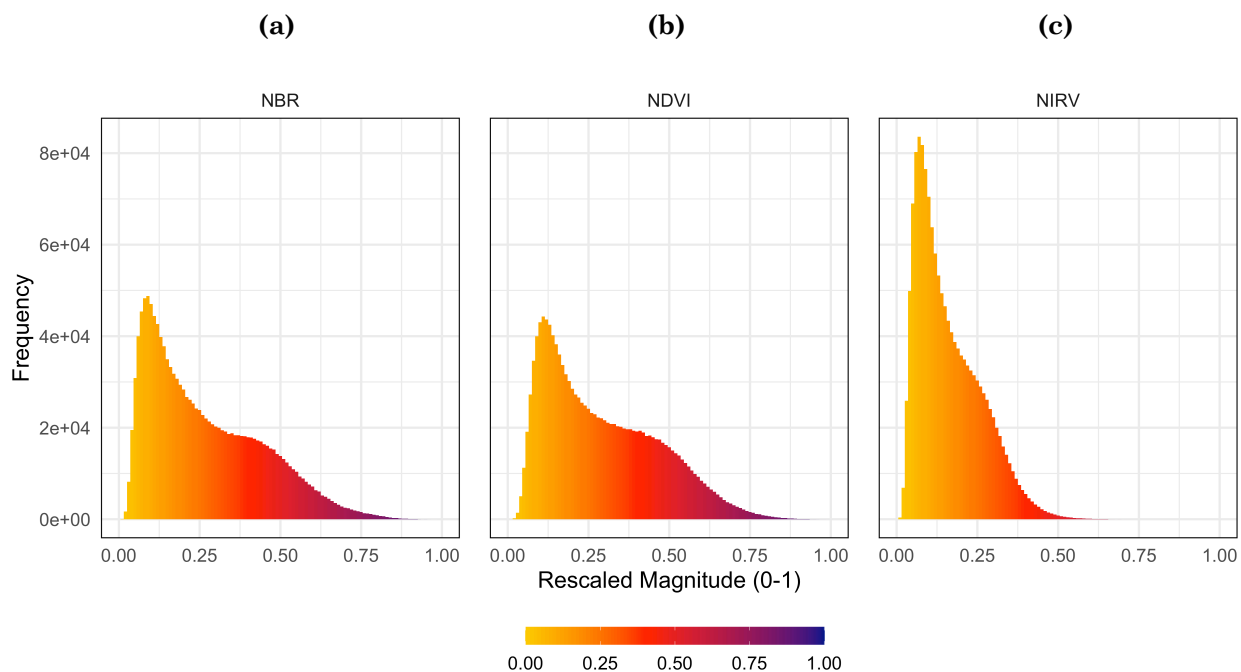

1473

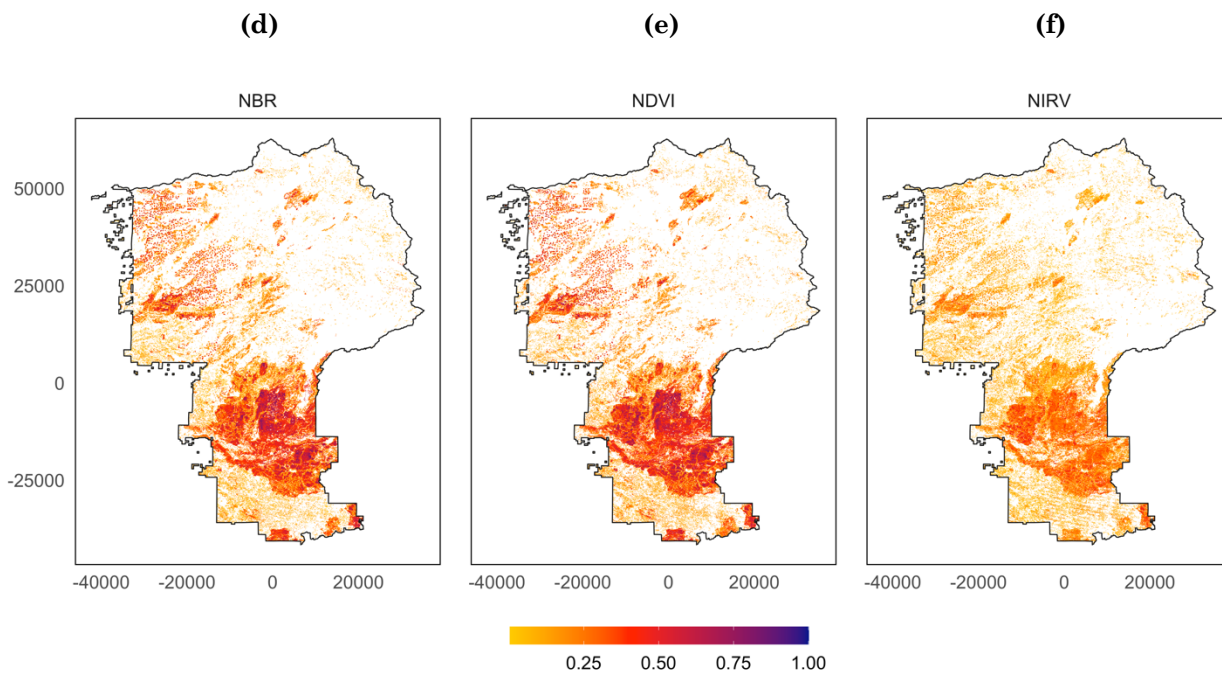

1474

1475 **Figure 9.**

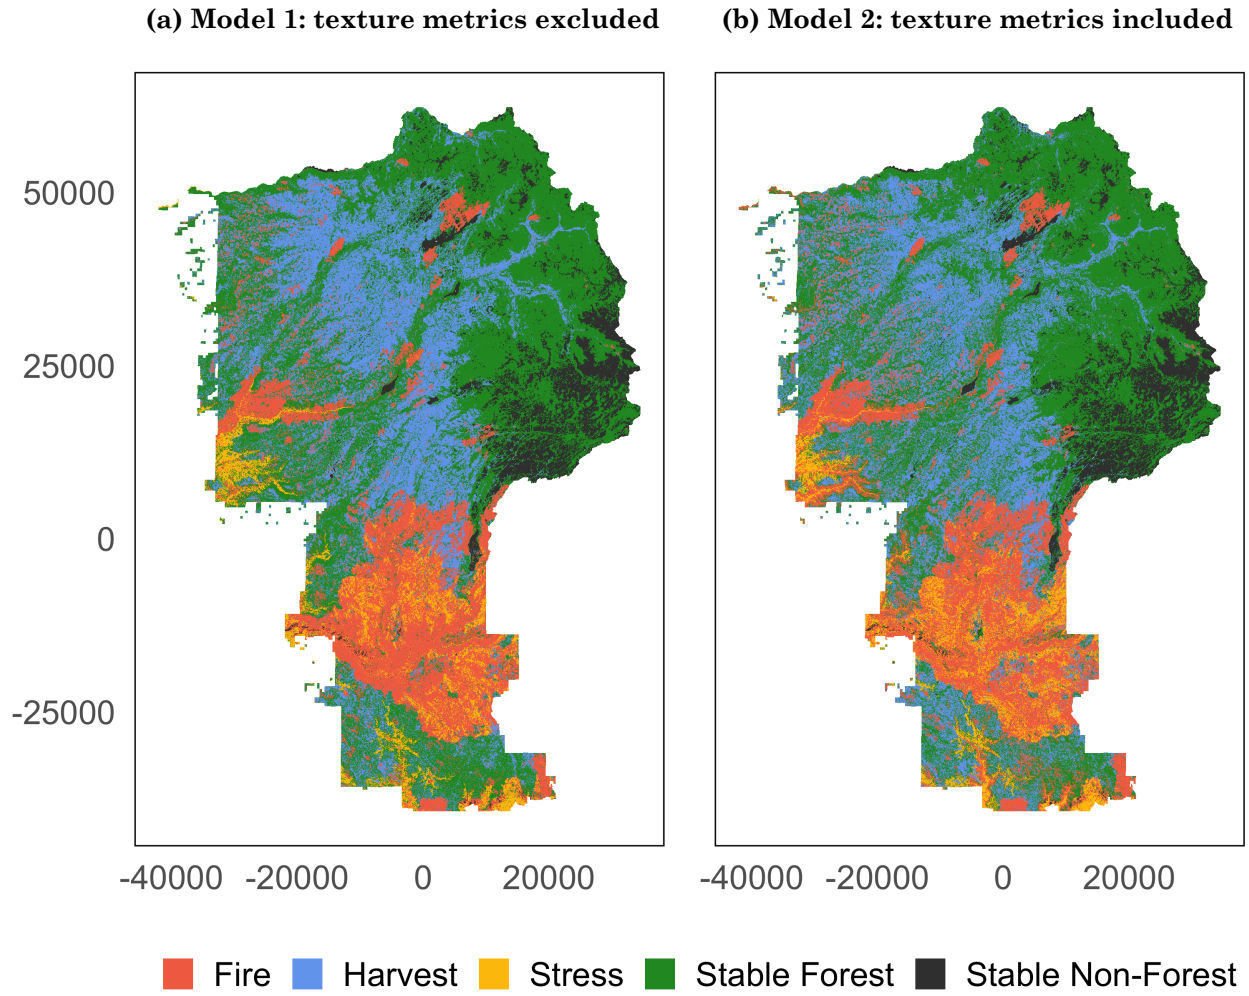

1477 **Figure 10.**

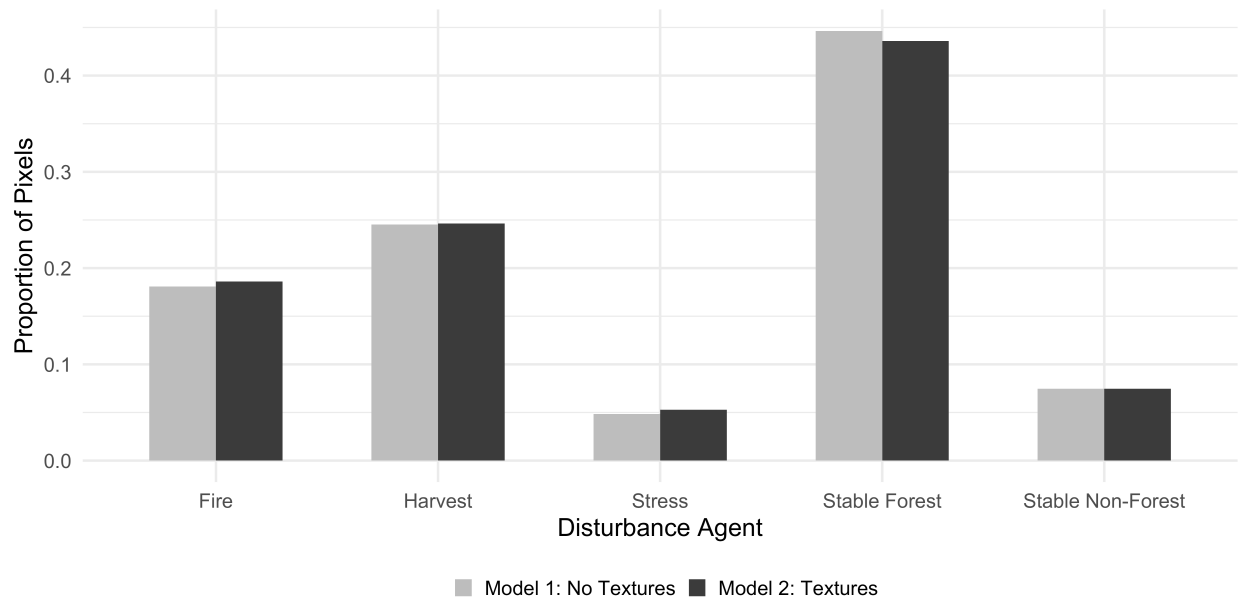

1478

1479 **Figure 11.**

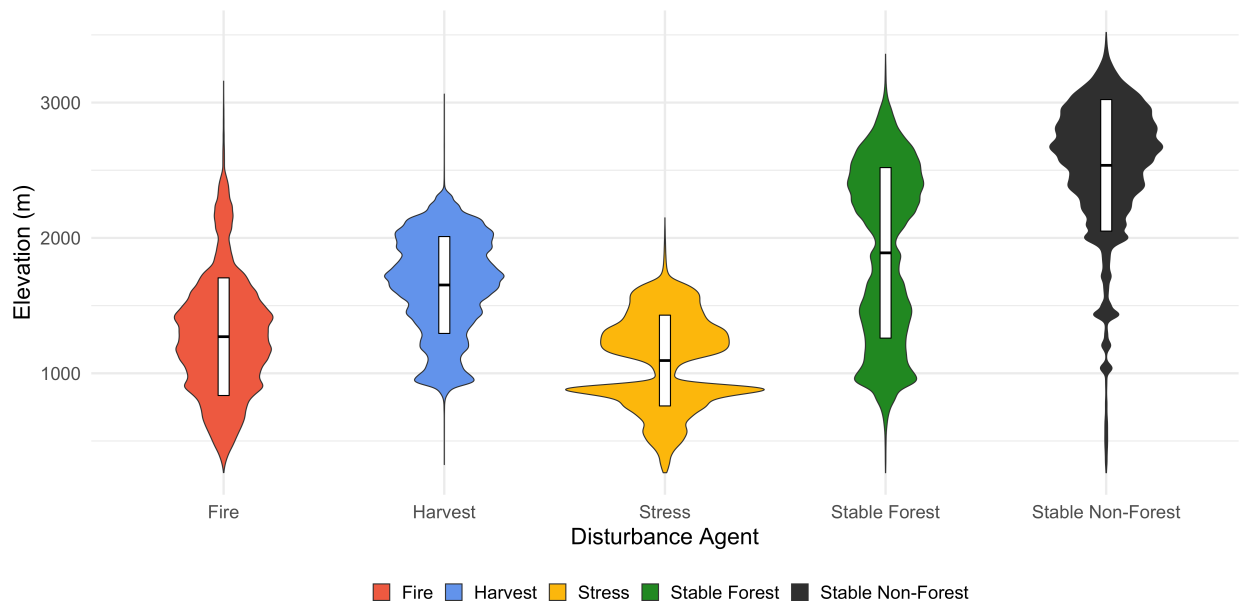

1480

1481 **Appendix A.** GLCM texture variable definitions

1482

1483 **Table A.** Names and definitions of the 14 GLCM texture metrics calculated on annual NDVI, NBR,  
 1484 and NIR<sub>v</sub> composites from 1999–2015. These metrics were tested for correlation using Pearson’s  $r$ ,  
 1485 and the statistics were reported in a correlation matrix (Fig. 5 in the main text). Definitions are from  
 1486 Zwanenburg et al. (2016), Gorelick et al. (2017), and Hall-Beyer (2017).

| Code    | GLCM Variable                  | Measurement                                                                                                |
|---------|--------------------------------|------------------------------------------------------------------------------------------------------------|
| asm     | Angular second moment          | Number of repeated grey-level values in neighborhood                                                       |
| con     | Contrast                       | Magnitude of local differences in grey-level values                                                        |
| cor     | Correlation                    | Linear correlation between pixels in neighborhood                                                          |
| dent    | Difference entropy             | Disorder of the distribution of grey-level differences                                                     |
| diss    | Dissimilarity                  | Mean of the distribution of grey-level differences                                                         |
| dvar    | Difference variance            | Dispersion (about the mean) of the distribution of grey-level differences                                  |
| ent     | Entropy                        | Randomness of grey-level distribution                                                                      |
| idm     | Inverse-difference moment      | Local homogeneity of an image                                                                              |
| imcorr1 | Inform. meas of correlation 1  | Linear dependency between grey-level values as a function of the amount of information in the target pixel |
| imcorr2 | Inform. meas. of correlation 2 | Linear dependency between grey-level values as a function of the amount of information in the test pixel   |
| savg    | Sum average                    | Mean of the distribution of neighborhood grey-level sums                                                   |
| sent    | Sum entropy                    | Disorder of the distribution of neighborhood grey-level sums                                               |
| svar    | Sum variance                   | Dispersion (about the mean) of the distribution of neighborhood grey-level sums                            |
| var     | Variance                       | Dispersion (about the mean) of the distribution of grey levels                                             |

1487



1488 **Appendix B.** Model predictors

1489 **Table B.1.** Predictors for Model 1: textures excluded

| Category                               | Variable                               | Name              | Coverage         |
|----------------------------------------|----------------------------------------|-------------------|------------------|
| Topographic                            | Elevation                              | elevation         | Full domain      |
|                                        | Cosine-transformed aspect              | cos_aspect        |                  |
|                                        | Sine-transformed aspect                | sin_aspect        |                  |
|                                        | Slope                                  | slope             |                  |
| Ternary                                | NBR cover ternary                      | NBR_coverTernary  | Full domain      |
|                                        | NDVI cover ternary                     | NDVI_coverTernary |                  |
|                                        | NIRv cover ternary                     | NIRV_coverTernary |                  |
| Shape                                  | NBR fractal dimension                  | NBR_FracDim       | Disturbed pixels |
|                                        | NDVI fractal dimension                 | NDVI_FracDim      |                  |
|                                        | NIRv fractal dimension                 | NIRV_FracDim      |                  |
| Disturbance                            | NBR disturbance magnitude              | NBR_mag           | Disturbed pixels |
|                                        | NBR disturbance year of detection      | NBR_yod           |                  |
|                                        | NBR disturbance signal-to-noise ratio  | NBR_dsnr          |                  |
|                                        | NBR disturbance rate                   | NBR_rate          |                  |
|                                        | NDVI disturbance magnitude             | NDVI_mag          |                  |
|                                        | NDVI disturbance year of detection     | NDVI_yod          |                  |
|                                        | NDVI disturbance signal-to-noise ratio | NDVI_dsnr         |                  |
|                                        | NDVI disturbance rate                  | NDVI_rate         |                  |
|                                        | NIRv disturbance magnitude             | NIRV_mag          |                  |
|                                        | NIRv disturbance year of detection     | NIRV_yod          |                  |
| NIRv disturbance signal-to-noise ratio | NIRV_dsnr                              |                   |                  |
| NIRv disturbance rate                  | NIRV_rate                              |                   |                  |

1490

1491 **Table B.2.** Predictors for Model 2: textures included

| Category                 | Variable                                           | Name                | Coverage         |
|--------------------------|----------------------------------------------------|---------------------|------------------|
| Topographic              | Elevation                                          | elevation           | Full domain      |
|                          | Cosine-transformed aspect                          | cos_aspect          |                  |
|                          | Sine-transformed aspect                            | sin_aspect          |                  |
|                          | Slope                                              | slope               |                  |
| Ternary                  | NBR cover ternary                                  | NBR_coverTernary    | Full domain      |
|                          | NDVI cover ternary                                 | NDVI_coverTernary   |                  |
|                          | NIR <sub>v</sub> cover ternary                     | NIRV_coverTernary   |                  |
| Shape                    | NBR fractal dimension                              | NBR_FracDim         | Disturbed pixels |
|                          | NDVI fractal dimension                             | NDVI_FracDim        |                  |
|                          | NIR <sub>v</sub> fractal dimension                 | NIRV_FracDim        |                  |
| Disturbance              | NBR disturbance magnitude                          | NBR_mag             | Disturbed pixels |
|                          | NBR disturbance year of detection                  | NBR_yod             |                  |
|                          | NBR disturbance signal-to-noise ratio              | NBR_dsnr            |                  |
|                          | NBR disturbance rate                               | NBR_rate            |                  |
|                          | NDVI disturbance magnitude                         | NDVI_mag            |                  |
|                          | NDVI disturbance year of detection                 | NDVI_yod            |                  |
|                          | NDVI disturbance signal-to-noise ratio             | NDVI_dsnr           |                  |
|                          | NDVI disturbance rate                              | NDVI_rate           |                  |
|                          | NIR <sub>v</sub> disturbance magnitude             | NIRV_mag            |                  |
|                          | NIR <sub>v</sub> disturbance year of detection     | NIRV_yod            |                  |
|                          | NIR <sub>v</sub> disturbance signal-to-noise ratio | NIRV_dsnr           |                  |
| Texture                  | NIR <sub>v</sub> disturbance rate                  | NIRV_rate           | Disturbed pixels |
|                          | NBR contrast                                       | NBR_distpx_tex_con  |                  |
|                          | NBR correlation                                    | NBR_distpx_tex_cor  |                  |
|                          | NBR entropy                                        | NBR_distpx_tex_ent  |                  |
|                          | NDVI contrast                                      | NDVI_distpx_tex_con |                  |
|                          | NDVI correlation                                   | NDVI_distpx_tex_cor |                  |
|                          | NDVI entropy                                       | NDVI_distpx_tex_ent |                  |
|                          | NIR <sub>v</sub> contrast                          | NIRV_distpx_tex_con |                  |
|                          | NIR <sub>v</sub> correlation                       | NIRV_distpx_tex_cor |                  |
| NIR <sub>v</sub> entropy | NIRV_distpx_tex_ent                                |                     |                  |

1492
